# Supplementary material for: Substituted 2-arylquinoline and 2-methyl-1,2,3,4-tetrahydroquinoline derivatives with selective anticancer activity: synthesis, structure–activity relationships, and molecular modelling insights
Source: Royal Society of Chemistry journal article supplement (doi:10.1039/d3nj05505a), 2024-01-01
Supplement: d3nj05505a1.pdf [file d3nj05505a1.pdf]

**Substituted 2-Arylquinoline and 2-Methyl-1,2,3,4-tetrahydroquinoline  
Derivatives with selective Anticancer Activity: Synthesis, Structure–  
Activity Relationships, and Molecular Modelling Insights**

Carlos Mario Meléndez Gómez<sup>1\*</sup>, Gustavo Barraza<sup>1</sup>, Felipe Sojo,<sup>2,3</sup> Francisco

Arvelo,<sup>2,3</sup> Vladimir V. Kouznetsov<sup>4\*</sup>

✉ Carlos Mario Meléndez Gómez

[carlosmelendez@mail.uniatlantico.edu.co](mailto:carlosmelendez@mail.uniatlantico.edu.co)

<sup>1</sup>*Grupo de Investigación en Química orgánica y Biomédica, Programa de Química, Facultad de Ciencias Básicas, Universidad del Atlántico, A.A.1890, Barranquilla, Colombia.*

<sup>2</sup>*Centro de Biociencias Fundación Instituto de Estudios Avanzados-IDEA, Caracas Venezuela*

<sup>3</sup>*Laboratorio de Cultivo de Tejidos y Biología de Tumores, Instituto de Biología Experimental, Universidad Central de Venezuela, código postal 1041, Caracas, Venezuela*

<sup>4</sup>*Escuela de Química, Universidad Industrial de Santander, Cl. 9 # Cra 27, A.A. 680006, Bucaramanga, Colombia.*

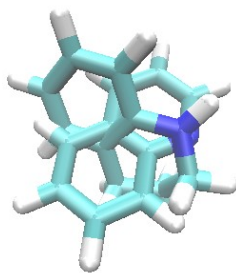

**Figure S1.** Structural alignment of the cores of IOX1, 2-Arylquinoline derivatives, and 2-Methyl-1,2,3,4-tetrahydroquinoline with RMSD of 0 Å and 2.42 Å, respectively.

### 3.1 Chemistry

#### Group F

#### 2-Phenylquinoline (4)

White solid. M.p.: 67-69 °C. Yield 54 %. IR (KBr):  $\nu$  1589, 1473, 1439, 849, 748  $\text{cm}^{-1}$ .  $^1\text{H}$  NMR (400 MHz):  $\delta$  8.22 (1H, d,  $J = 8.61$  Hz, 3-H), 8.19-8.16 (1H, m, 8-H), 8.19-8.16 (2H, m, 2'-H<sub>Ph</sub> and 6'-H<sub>Ph</sub>), 7.88 (1H, d,  $J = 8.58$  Hz, 4-H), 7.83 (1H, d,  $J = 8.08$  Hz, 5-H), 7.73 (1H, ddd,  $J = 7.20, 7.20, 0.72$  Hz, 6-H), 7.55-7.52 (1H, m, 7-H), 7.55-7.52 (2H, m, 3'-H<sub>Ph</sub> and 5'-H<sub>Ph</sub>), 7.47 (1H, t,  $J = 7.20$  Hz, 4'-H<sub>Ph</sub>);  $^{13}\text{C}$  NMR (CDCl<sub>3</sub>, 100 MHz):  $\delta$  157.3, 148.3, 139.7, 136.7, 129.7, 129.6, 129.2, 128.9 (2C), 127.5 (2C), 127.4, 127.1, 126.2, 118.9. MS  $m/z$  (EI) 205 ( $\text{M}^+$ ). calcd for C<sub>15</sub>H<sub>11</sub>N: C, 87.77; H, 5.40; N, 6.82. Found: C, 87.73; H, 5.37; N, 6.79.

#### 6-Ethyl-2-phenylquinoline (5)

White solid. M.p.: 63-66 °C. Yield 51%. IR (KBr):  $\nu$  2960, 2895, 1493, 1443  $\text{cm}^{-1}$ .  $^1\text{H}$  NMR (400 MHz):  $\delta$  8.17-8.13 (2H, m, 2'-H<sub>Ph</sub> and 6'-H<sub>Ph</sub>), 8.15-8.13 (1H, m, 3-H), 8.11 (1H, d,  $J = 9.28$  Hz, 8-H), 7.84 (1H, d,  $J = 8.56$  Hz, 4-H), 7.61-7.59 (1H, m, 5-H), 7.61-7.59 (1H, m, 7-H), 7.53 (2H, t,  $J = 7.08$  Hz, 3'-H<sub>Ph</sub> and 5'-H<sub>Ph</sub>), 7.46 (1H, t,  $J = 7.29$  Hz, 4'-H<sub>Ph</sub>), 2.85 (2H, q,  $J = 7.59$  Hz, CH<sub>3</sub>-CH<sub>2</sub>-), 1.36 (3H, t,  $J = 7.58$  Hz, CH<sub>3</sub>-CH<sub>2</sub>-);  $^{13}\text{C}$  NMR (100 MHz):  $\delta$  156.5, 147.1, 142.3, 139.8, 136.2, 130.8, 129.5, 129.0, 128.7 (2C), 127.4 (2C), 127.2, 124.9, 118.9, 28.8, 15.3. MS  $m/z$  (EI) 233 ( $\text{M}^+$ ). Calcd for C<sub>17</sub>H<sub>15</sub>N: C, 87.52; H, 6.48; N, 6.00. Found: C, 87.51; H, 6.50; N, 6.02.

### 6-Nitro-2-phenylquinoline (6)

Brown solid. M.p.: 175-178 °C. Yield 56%. IR (KBr):  $\nu$  3456, 1592, 1537, 1476, 873  $\text{cm}^{-1}$ .  $^1\text{H}$  NMR (400 MHz):  $\delta$  8.78 (1H, d,  $J = 2.41$  Hz, 6-H), 8.47 (1H, dd,  $J = 9.22, 2.45$  Hz, 7-H), 8.37 (1H, d,  $J = 8.68$  Hz, 3-H), 8.26 (1H, d,  $J = 9.24$  Hz, 8-H), 8.22-8.20 (2H, m, 2'-H<sub>Ph</sub> and 6'-H<sub>Ph</sub>), 7.56-7.54 (2H, m, 3'-H<sub>Ph</sub> and 5'-H<sub>Ph</sub>), 7.48-7.50 (1H, m, 4'-H<sub>Ph</sub>);  $^{13}\text{C}$  NMR (100 MHz):  $\delta$  160.6, 150.4, 138.4, 131.4, 130.5, 129.0 (2C), 127.8 (2C), 127.5, 127.4, 124.3, 123.2, 120.6, 77.0. MS  $m/z$  (EI) 250 ( $\text{M}^+$ ). Calcd for  $\text{C}_{15}\text{H}_{10}\text{N}_2\text{O}_2$ : C, 71.99; H, 4.03; N, 11.19. Found: C, 71.98; H, 4.02; N, 11.22.

### 6-Fluoro-2-phenylquinoline (7)

Beige solid. M.p.: 128-131 °C. Yield 58 %. IR (KBr):  $\nu$  1484, 1231, 831, 750, 686  $\text{cm}^{-1}$ .  $^1\text{H}$  NMR (400 MHz):  $\delta$  8.19-8.15 (1H, m, 8-H), 8.19-8.15 (2H, m, 2'-H<sub>Ph</sub> and 6'-H<sub>Ph</sub>), 8.15-8.13 (1H, m, 3-H), 7.86 (1H, d,  $J = 8.72$  Hz, 4-H), 7.56-7.52 (2H, m, 3'-H<sub>Ph</sub> and 5'-H<sub>Ph</sub>), 7.50-7.46 (1H, m, 7-H), 7.50-7.46 (1H, m, 5-H), 7.43 (1H, dd,  $J = 8.80, 2.80$  Hz, 4'-H<sub>Ph</sub>);  $^{13}\text{C}$  NMR (100 MHz):  $\delta$  161.7, 156.7, 145.5, 139.4, 135.9, 132.2, 129.4, 128.8 (2C), 127.4 (2C), 119.8, 119.6, 110.5, 110.3; MS  $m/z$  (EI) 223 ( $\text{M}^+$ ). Calcd for  $\text{C}_{15}\text{H}_{10}\text{FN}$ : C, 80.70; H, 4.51; F, 8.51; N, 6.27. Found: C, 80.73; H, 4.50; F, 8.53; N, 6.29.

### 6-Chloro-2-phenylquinoline (8)

Beige solid. M.p.: 134-137 °C. Yield 50 %. IR (KBr):  $\nu$  1495, 1223, 835, 752, 687  $\text{cm}^{-1}$ .  $^1\text{H}$  NMR ( $\text{CDCl}_3$ , 400 MHz):  $\delta$  8.16-8.14 (1H, m, 3-H), 8.16-8.14 (1H, m, 8-H), 8.11 (2H, d,  $J = 7.76$  Hz, 2'-H<sub>Ph</sub> and 6'-H<sub>Ph</sub>), 7.89 (1H, d,  $J = 8.48$  Hz, 4-H), 7.80 (1H, d,  $J = 2.30$  Hz, 6-H), 7.65 (1H, dd,  $J = 9.02, 2.33$  Hz, 7-H), 7.53 (2H, t,  $J = 7.50$  Hz, 3'-H<sub>Ph</sub> and 5'-H<sub>Ph</sub>), 7.47 (1H, t,  $J = 7.15$  Hz, 4'-H<sub>Ph</sub>);  $^{13}\text{C}$  NMR (100 MHz):  $\delta$  157.5, 146.6, 139.2, 135.8, 131.9, 131.3, 130.5, 129.5, 128.9 (2C), 127.7 (2C), 127.5, 126.1, 119.7. MS  $m/z$  (EI) 239 ( $\text{M}^+$ ). Calcd for  $\text{C}_{15}\text{H}_{10}\text{ClN}$ : C, 75.16; H, 4.21; Cl, 14.79; N, 5.84. Found: C, 75.16; H, 4.23; Cl, 14.81; N, 5.82.

### 6,7-methylenedioxy-2-Phenylquinoline (10)

Beige solid. M.p.: 109-111 °C. Yield 54%. IR (KBr):  $\nu$  1457, 1228, 1029, 849, 748  $\text{cm}^{-1}$ .  $^1\text{H}$  NMR ( $\text{CDCl}_3$ ):  $\delta$  8.11 (2H, dd,  $J = 7.11, 1.47$  Hz, 2'- $\text{H}_{\text{Ph}}$  and 6'- $\text{H}_{\text{Ph}}$ ), 7.98 (1H, d,  $J = 8.48$  Hz, 3-H), 7.69 (1H, d,  $J = 8.49$  Hz, 4-H), 7.51 (2H, dd,  $J = 7.12, 1.68$  Hz, 3'- $\text{H}_{\text{Ph}}$  and 5'- $\text{H}_{\text{Ph}}$ ), 7.46 (1H, s, 8-H), 7.03 (1H, s, 5-H), 6.08 (2H, s, -O- $\text{CH}_2$ -O-);  $^{13}\text{C}$  NMR (100 MHz):  $\delta$  155.2, 150.7, 147.6, 146.4, 139.7, 135.4, 128.8, 128.7 (2C), 127.1 (2C), 124.0, 117.1, 106.1, 102.4, 101.6. MS  $m/z$  (EI) 249 ( $\text{M}^+$ ). Calcd for  $\text{C}_{16}\text{H}_{11}\text{NO}_2$ : C, 77.10; H, 4.45; N, 5.62. Found: C, 77.13; H, 4.43; N, 5.64.

### Group G

#### 2-(Phenyl-3',4'-dioxomethylen)-quinoline (11)

Yellow solid. M.p.: 90-92 °C. Yield 50%. IR (KBr):  $\nu$  2884, 1594, 1495, 1248, 1042  $\text{cm}^{-1}$ .  $^1\text{H}$  NMR (400 MHz):  $\delta$  8.16 (1H, d,  $J = 8.56$  Hz, 3-H), 8.12 (1H, d,  $J = 8.49$  Hz, 4-H), 7.80 (1H, m, 8-H), 7.77 (1H, m, 5-H), 7.74 (1H, d,  $J = 1.71$  Hz, 2'- $\text{H}_{\text{Ph}}$ ), 7.70 (1H, ddd,  $J = 8.41, 8.41, 1.45$  Hz, 7-H), 7.65 (1H, dd,  $J = 8.07, 1.71$  Hz, 6'- $\text{H}_{\text{Ph}}$ ), 7.50 (1H, ddd,  $J = 8.07, 8.07, 1.13$  Hz, 6-H), 6.95 (1H, d,  $J = 8.13$  Hz, 5'- $\text{H}_{\text{Ph}}$ ), 6.03 (2H, s, -O $\text{CH}_2$ O-);  $^{13}\text{C}$  NMR ( $\text{CDCl}_3$ ):  $\delta$  156.6, 148.8, 148.4, 148.2, 136.6, 134.1, 129.6, 129.5, 127.4, 127.0, 126.0, 121.7, 118.5, 108.4, 107.9, 101.3. MS  $m/z$  (EI) 249 ( $\text{M}^+$ ). Calcd for  $\text{C}_{16}\text{H}_{11}\text{NO}_2$ : C, 77.10; H, 4.45; N, 5.62. Found: C, 77.13; H, 4.44; N, 5.62.

#### 2-(Phenyl-3',4'-dioxomethylen)-6-methylquinoline (12)

Yellow solid. M.p.: 166-168. Yield 41%. IR (KBr):  $\nu$  2898, 1587, 1490, 1460, 1246  $\text{cm}^{-1}$ .  $^1\text{H}$  NMR (400 MHz):  $\delta$  8.07 (1H, d,  $J = 8.56$  Hz, 3-H), 8.00 (1H, d,  $J = 8.56$  Hz, 4-H), 7.74 (1H, d,  $J = 8.56$  Hz, 8-H), 7.72 (1H, d,  $J = 1.71$  Hz, 2'- $\text{H}_{\text{Ph}}$ ), 7.63 (1H, dd,  $J = 8.31, 1.71$  Hz, 6'- $\text{H}_{\text{Ph}}$ ), 6.92 (1H, d,  $J = 8.31$  Hz, 5'- $\text{H}_{\text{Ph}}$ ), 7.54 (1H, m, 7-H), 7.52 (1H, d,  $J = 1.71$  Hz, 5-H), 6.03 (2H, s, -O $\text{CH}_2$ O-), 2.53 (3H, s, 6- $\text{CH}_3$ );  $^{13}\text{C}$  NMR (100 MHz):  $\delta$  155.9, 148.7, 148.4, 146.8, 136.0, 135.9, 134.3, 131.9, 129.3, 127.0, 126.3, 121.6, 118.6, 108.4, 107.9, 101.3, 21.5. MS  $m/z$  (EI) 263 ( $\text{M}^+$ ). Calcd for  $\text{C}_{17}\text{H}_{13}\text{NO}_2$ : C, 77.55; H, 4.98; N, 5.32. Found: C, 77.54; H, 4.97; N, 5.32.

### 2-(Phenyl-3',4'-dioxomethylen)-6-methoxyquinoline (13)

Brown solid. M.p.: 139-141. Yield 59 %. IR (KBr):  $\nu$  2960, 2037, 1612, 1588, 1489  $\text{cm}^{-1}$ .  $^1\text{H}$  NMR (400 MHz):  $\delta$  8.06 (1H, d,  $J = 8.64$  Hz, 3-H), 8.02 (1H, d,  $J = 9.21$  Hz, 4-H), 7.69 (1H, d,  $J = 1.67$  Hz, 2'-H<sub>Ph</sub>), 7.61 (1H, dd,  $J = 8.12, 1.72$  Hz, 6'-H<sub>Ph</sub>), 7.74 (1H, d,  $J = 8.62$  Hz, 8-H), 7.36 (1H, dd,  $J = 9.26, 2.79$  Hz, 7-H), 7.07 (1H, s,  $J = 2.75$  Hz, 5-H), 6.93 (1H, d,  $J = 8.12$  Hz, 5'-H<sub>Ph</sub>), 6.03 (2H, s, -OCH<sub>2</sub>O-), 3.94 (3H, s, 6-OCH<sub>3</sub>). MS  $m/z$  (EI) 279 ( $\text{M}^+$ ). Calcd for C<sub>17</sub>H<sub>13</sub>NO<sub>3</sub>: C, 73.11; H, 4.69; N, 5.02. Found: C, 73.13; H, 4.70; N, 5.04.

### 2-(Phenyl-3',4'-dioxomethylen)-7-ethylquinoline (14)

Yellow solid. M.p.: 175-177. Yield 40 %. IR (KBr):  $\nu$  2959, 2898, 1585, 1490, 1442  $\text{cm}^{-1}$ .  $^1\text{H}$  NMR (400 MHz):  $\delta$  8.16 (1H, d,  $J = 8.60$  Hz, 3-H), 8.12 (1H, d,  $J = 8.68$  Hz, 4-H), 7.79 (1H, d,  $J = 1.76$  Hz, 2'-H<sub>Ph</sub>), 7.77 (1H, d,  $J = 7.95$  Hz, 5-H), 7.68 (1H, dd,  $J = 8.15, 1.74$  Hz, 6'-H<sub>Ph</sub>), 7.50 (1H, d,  $J = 1.55$  Hz, 8-H), 7.49 (1H, dd,  $J = 7.98, 1.44$  Hz, 6-H), 7.08 (1H, d,  $J = 8.15, 5'$ -H<sub>Ph</sub>), 5.94 (2H, s, -OCH<sub>2</sub>O-), 1.84 (2H, q,  $J = 7.95$  Hz, 8-CH<sub>2</sub>CH<sub>3</sub>-), 1.18 (3H, t,  $J = 7.95$  Hz, 8-CH<sub>2</sub>CH<sub>3</sub>-). MS  $m/z$  (EI) 277 ( $\text{M}^+$ ). Calcd for C<sub>18</sub>H<sub>15</sub>NO<sub>2</sub>: C, 77.96; H, 5.45; N, 5.05. Found: C, 77.99; H, 5.46; N, 5.07.

### 2-(Phenyl-3',4'-dioxomethylen)-6,8-dimethoxyquinoline (15)

Yellow solid. M.p.: 146-148. Yield 62 %. IR (film):  $\nu$  2955, 2899, 1607, 1478, 1451  $\text{cm}^{-1}$ .  $^1\text{H}$  NMR (400 MHz):  $\delta$  8.02 (1H, d,  $J = 8.65$  Hz, 3-H), 7.76 (1H, d,  $J = 8.62$  Hz, 4-H), 7.71 (1H, d,  $J = 1.71$  Hz, 2'-H<sub>Ph</sub>), 7.62 (1H, dd,  $J = 8.13, 1.76$  Hz, 6'-H<sub>Ph</sub>), 6.91 (1H, d,  $J = 8.07$  Hz, 5'-H<sub>Ph</sub>), 6.71 (1H, d,  $J = 2.47$  Hz, 5-H), 6.65 (1H, d,  $J = 2.48$  Hz, 7-H), 6.01 (2H, s, -OCH<sub>2</sub>O-), 4.05 (1H, s, 8-OCH<sub>3</sub>), 3.92 (1H, s, 6-H);  $^{13}\text{C}$  NMR (100 MHz):  $\delta$  158.0, 156.4, 153.3, 148.3, 148.2, 136.6, 135.5, 134.4, 128.6, 121.3, 119.4, 108.3, 107.8, 101.5, 101.2, 96.8, 56.1, 55.5. MS  $m/z$  (EI) 309 ( $\text{M}^+$ ). Calcd for C<sub>18</sub>H<sub>15</sub>NO<sub>4</sub>: C, 69.89; H, 4.89; N, 4.53; Found: C, 69.88; H, 4.90; N, 4.52.

### 2-(Phenyl-3',4'-dioxomethylen)-5,8-dimethylquinoline (16)

Yellow solid. M.p.: 170-173. Yield 58 %. IR (KBr):  $\nu$  2896, 1591, 1487, 1463, 1251  $\text{cm}^{-1}$ .  $^1\text{H}$  NMR (400 MHz):  $\delta$  8.28 (1H, d,  $J = 8.82$  Hz, 3-H), 7.88 (1H, d,  $J = 1.67$  Hz, 2'-H<sub>Ph</sub>), 7.81 (1H, d,  $J = 8.82$  Hz, 4-H), 7.73 (1H, dd,  $J = 8.15, 1.68$  Hz, 6'-H<sub>Ph</sub>), 7.44 (1H, d,  $J = 7.09$  Hz, 7-H), 7.20 (1H, d,  $J = 7.09$  Hz, 6-H), 6.95 (1H, d,  $J = 8.13$  Hz, 5'-H<sub>Ph</sub>), 6.04 (2H, s, -OCH<sub>2</sub>O-),

2.84 (3H, s, 5-CH<sub>3</sub>), 2.64 (3H, s, 8-CH<sub>3</sub>); <sup>13</sup>C NMR (CDCl<sub>3</sub>, 100 MHz): δ 154.2, 148.6, 148.3, 147.2, 135.3, 134.4, 133.2, 131.8, 129.2, 126.2, 126.1, 121.4, 117.1, 108.3, 107.8, 101.2, 18.3, 17.8. MS *m/z* (EI) 277 (M<sup>+</sup>). Calcd for C<sub>18</sub>H<sub>15</sub>NO<sub>2</sub>: C, 77.96; H, 5.45; N, 5.05. Found: C, 77.94; H, 5.46; N, 5.03

#### **N-(2-Methyl-1,2,3,4-tetrahydroquinolin-4-yl)acetamide (17)**

IR (KBr): ν 3247, 3335, 1640 cm<sup>-1</sup>. <sup>1</sup>H NMR (400 MHz, CDCl<sub>3</sub>): δ = 1.18 (d, *J* = 6.3 Hz, 3 H, 2-CH), 1.39 (q, *J* = 11.5 Hz, 1 H, H<sub>3ax</sub>), 2.02 (s, 3 H, CH<sub>3</sub>-C=O), 2.22 (ddd, *J* = 12.4, 6.0, 2.3 Hz, 1 H, H<sub>3eq</sub>), 3.50 (ddd, *J* = 11.3, 6.3, 2.3 Hz, 1H, H<sub>2</sub>), 3.53 (br s, 1 H, NH), 5.27 (ddd, *J* = 11.6, 9.2, 6.2 Hz, 1H, H<sub>4</sub>), 5.88 (d, *J* = 8.7 Hz, 1 H, HN-C=O), 6.46 (dd, *J* = 8.0, 1.0 Hz, 1H, H<sub>8</sub>), 6.65 (td, *J* = 7.4, 1.1 Hz, 1 H, H<sub>6</sub>), 7.00 (td, *J* = 8.8, 1.5 Hz, 1 H, H<sub>7</sub>), 7.07 (td, *J* = 7.7, 1.1 Hz, 1 H, H<sub>5</sub>). <sup>13</sup>C NMR (100 MHz, CDCl<sub>3</sub>): δ = 22.1, 23.4, 37.8, 46.1, 46.6, 114.3, 117.6, 121.4, 126.8, 128.1, 145.1, 170.1. GC-MS (EI) (*t<sub>R</sub>* = 17.39 min): *m/z* (%) = 204 (18, M<sup>+</sup>), 130 (100), 144 (73). Anal. Calcd for C<sub>12</sub>H<sub>16</sub>N<sub>2</sub>O: C, 70.56; H, 7.90; N, 13.71. Found: C, 70.65; H, 7.74; N, 13.55.

#### **N-(6-Ethyl-2-methyl-1,2,3,4-tetrahydroquinolin-4-yl)acetamide (18)**

IR (KBr): ν 3347, 3309, 1635 cm<sup>-1</sup>. <sup>1</sup>H NMR (200 MHz, CDCl<sub>3</sub>): δ = 1.01 (d, *J* = 7.9 Hz, 3 H, 2-CH<sub>3</sub>), 1.03 (t, *J* = 7.9 Hz, 3 H, 6-CH<sub>2</sub>CH<sub>3</sub>), 1.09–1.05 (m, 1 H, H<sub>3</sub>), 1.32 (q, *J* = 11.2 Hz, 1 H, H<sub>3ax</sub>), 1.53 (s, 1 H, NH), 1.94 (s, 3 H, CH<sub>3</sub>-C=O), 2.07 (ddd, *J* = 10.4, 6.1, 4.0 Hz, 1 H, H<sub>3eq</sub>), 2.38 (q, *J* = 7.5 Hz, 2 H, 6-CH<sub>2</sub>CH<sub>3</sub>), 3.38 – 3.30 (m, 1 H, H<sub>2</sub>), 5.12 (dd, *J* = 11.2, 2.9 Hz, 1 H, H<sub>4</sub>), 6.37–6.73 (br s, 1 H, H<sub>5</sub>), 6.75 (d, *J* = 8.6 Hz, 1 H, H<sub>7</sub>). <sup>13</sup>C NMR (100 MHz, CDCl<sub>3</sub>): δ = 15.8, 21.8, 22.7, 28.0, 37.7, 46.0, 46.8, 115.0, 121.9, 126.3, 127.5, 134.2, 142.8, 171.2. CG-EM (EI) (*t<sub>R</sub>* = 18.55 min): *m/z* (%) = 232 (21, M<sup>+</sup>). Anal. Calcd for C<sub>14</sub>H<sub>20</sub>N<sub>2</sub>O: C, 72.38; H, 8.68; N, 12.06. Found: C, 72.55; H, 8.47; N, 12.18.

#### **N-(6-Methoxy-2-methyl-1,2,3,4-tetrahydroquinolin-4-yl)acetamide (19)**

IR (KBr): ν 3293, 3371, 1639, 1211 cm<sup>-1</sup>. <sup>1</sup>H NMR (400 MHz, CDCl<sub>3</sub>): δ = 1.19 (d, *J* = 6.3 Hz, 3 H, 2-CH<sub>3</sub>), 1.41 (q, *J* = 11.4 Hz, 1 H, H<sub>3ax</sub>), 1.61–1.84 (m, 1 H, NH), 2.03 (s, 3H, CH<sub>3</sub>-C=O), 2.28 (ddd, *J* = 12.4, 6.3, 2.1 Hz, 1 H, H<sub>3eq</sub>), 3.43 (ddd, *J* = 11.5, 6.2, 2.1 Hz, 1 H, H<sub>2</sub>), 3.72 (s, 3 H, OCH<sub>3</sub>), 5.31 (ddd, *J* = 11.3, 9.4, 6.1 Hz, 1 H, H<sub>4</sub>), 5.67 (d, *J* = 8.6 Hz, 1 H, HN-C=O), 6.48 (d, *J* = 8.7 Hz, 1 H, H<sub>8</sub>), 6.66 (dd, *J* = 8.7, 2.9 Hz, 1 H, H<sub>7</sub>), 6.70 (d, *J* = 2.7, 0.7

Hz, 1 H, H5).  $^{13}\text{C}$  NMR (100 MHz,  $\text{CDCl}_3$ ):  $\delta = 22.4, 23.7, 38.4, 46.6, 47.2, 56.0, 112.7, 114.5, 115.8, 123.0, 139.6, 152.4, 170.2$ . GC-MS (EI) ( $t_R = 20.60$  min):  $m/z$  (%) = 234 (19,  $\text{M}^+$ ), 160 (100), 174 (54), 161 (20). Anal. Calcd for  $\text{C}_{13}\text{H}_{18}\text{N}_2\text{O}_2$ : C, 66.64; H, 7.74; N, 11.96. Found: C, 66.48; H, 7.90; N, 11.78.

#### **N-(2,5,7-Trimethyl-1,2,3,4-tetrahydroquinolin-4-yl)acetamide (20)**

IR (KBr):  $\nu$  3347, 3301, 1627  $\text{cm}^{-1}$ .  $^1\text{H}$  NMR (400 MHz,  $\text{CDCl}_3$ ):  $\delta = 1.18$  (d,  $J = 6.4$  Hz, 3 H, 2- $\text{CH}_3$ ), 1.68 (q,  $J = 11.8$  Hz, 1 H,  $\text{H}_{3_{\text{ax}}}$ ), 2.15 (s, 3 H, 7- $\text{CH}_3$ ), 2.17 (s, 3 H, 5- $\text{CH}_3$ ), 2.22 (s, 3 H,  $\text{CH}_3\text{-C=O}$ ), 2.28 (ddd,  $J = 11.8, 6.3, 2.1$  Hz, 1H,  $\text{H}_{3_{\text{eq}}}$ ), 3.32–3.40 (m, 1 H, H2), 3.71 (s, 1 H, NH), 5.19 (ddd,  $J = 15.1, 7.7, 7.4$  Hz, 1 H, H4), 5.68 (d,  $J = 8.0$  Hz, 1 H,  $\text{HN-C=O}$ ), 6.21 (s, 1 H, H8), 6.37 (s, 1 H, H6).  $^{13}\text{C}$  NMR (100 MHz,  $\text{CDCl}_3$ ):  $\delta = 19.2, 20.8, 22.3, 22.9, 38.2, 43.9, 46.0, 113.4, 116.6, 121.5, 137.9, 138.2, 146.3, 168.9$ . CG-EM (EI) ( $t_R = 19.93$  min):  $m/z$  (%) = 232 (24,  $\text{M}^+$ ), 158 (100), 172 (63). Anal. Calcd for  $\text{C}_{14}\text{H}_{20}\text{N}_2\text{O}$ : C, 72.38; H, 8.68; N, 12.06. Found: C, 72.15; H, 8.83; N, 11.87.

#### **N-(6-Chloro-2-methyl-1,2,3,4-tetrahydroquinolin-4-yl)acetamide (21)**

IR (KBr):  $\nu$  3383, 3290, 1734, 1635, 1496, 1342, 725  $\text{cm}^{-1}$ .  $^1\text{H}$  NMR (400 MHz,  $\text{CDCl}_3$ ):  $\delta = 1.16$  (d,  $J = 6.3$  Hz, 3 H, 2- $\text{CH}_3$ ), 1.36 (q,  $J = 11.5$  Hz, 1 H, H3), 2.03 (s, 3 H,  $\text{CH}_3\text{-C=O}$ ), 2.16 (ddd,  $J = 12.3, 6.0, 2.3$  Hz, 1 H, H3), 3.47 (dq,  $J = 12.3, 6.2, 2.2$  Hz, 1 H, H2), 3.75 (br s, 1 H, NH), 5.15–5.23 (m, 1 H, H4), 6.00 (d,  $J = 9.1$  Hz, 1 H,  $\text{HN-C=O}$ ), 6.36 (d,  $J = 8.5$  Hz, 1 H, H8), 6.90 (dd,  $J = 8.5, 2.3$  Hz, 1 H, H7), 6.99–7.00 (m, 1 H, H5).  $^{13}\text{C}$  NMR (100 MHz,  $\text{CDCl}_3$ ):  $\delta = 22.2, 23.5, 38.0, 46.2, 46.7, 114.4, 117.7, 121.6, 127.0, 128.3, 145.3, 170.3$ . CG-EM (EI) ( $t_R = 21.09$  min):  $m/z$  (%) = 238 (30,  $\text{M}^+$ ), 164 (100), 177 (51). Anal. Calcd for  $\text{C}_{12}\text{H}_{15}\text{ClN}_2\text{O}$ : C, 60.38; H, 6.33; N, 11.74. Found: C, 66.41; H, 7.24; N, 11.89.

**Comment.** Although some of these values are outside the expected range for high analytical purity, they are provided to illustrate the best values that could be obtained to date.

#### **N-(2-methyl-6-fluoro-tetrahydroquinolin-4-yl)acetamide (22)**

IR (KBr):  $\nu$  3343, 3294, 1630  $\text{cm}^{-1}$ ;  $^1\text{H}$  NMR (400 MHz,  $\text{CDCl}_3$ ) = 1.16 (d,  $J = 6.3$  Hz, 3H, 2- $\text{CH}_3$ ), 1.41-1.32 (m, 1H,  $\text{H}_{3_{\text{ax}}}$ ), 2.02 (3H, s,  $\text{CH}_3\text{-C=O}$ ), 2.17 (ddd,  $J = 12.4, 6.1, 2.8$  Hz, 1

H, H3<sub>cc</sub>), 3.49-3.41 (m, 1 H, 2-H), 3.65 (s.a, 1 H, NH), 6.26-5.19 (m, 1 H, 4-H), 5.95 (d,  $J = 8.9$  Hz, 1 H, NHC(O)), 6.39 (dd,  $J = 8.7, 4.7$  Hz, 1 H, H8), 6.70 (ddd,  $J = 8.2, 6.7, 2.9$  Hz, 1H, 7H), 6.78 (dd,  $J = 9.5, 2.0$  Hz, 1 H, H5), ppm. <sup>13</sup>C NMR (100 MHz, CDCl<sub>3</sub>):  $\delta = 22.0, 23.2, 37.6, 46.1, 46.8, 113.1, 113.3, 114.7, 114.9, 115.0, 115.1, 122.8, 141.3, 154.5, 156.8, 170.1$  ppm; CG-EM  $t_R$ : 17.52 min.,  $m/z$  (%) = 222 (25, M<sup>+</sup>), 148 (100), 162 (70). Anal. Calcd for C<sub>12</sub>H<sub>15</sub>FN<sub>2</sub>O: C, 64.85; H, 6.80; N, 12.60. Found: C, 66.67; H, 6.93; N, 12.51.

**Comment.** Although some of these values are outside the expected range for high analytical purity, they are provided to illustrate the best values that could be obtained to date.



## NMR spectra

### $^1\text{H}$ NMR of 2-Phenylquinoline (4)

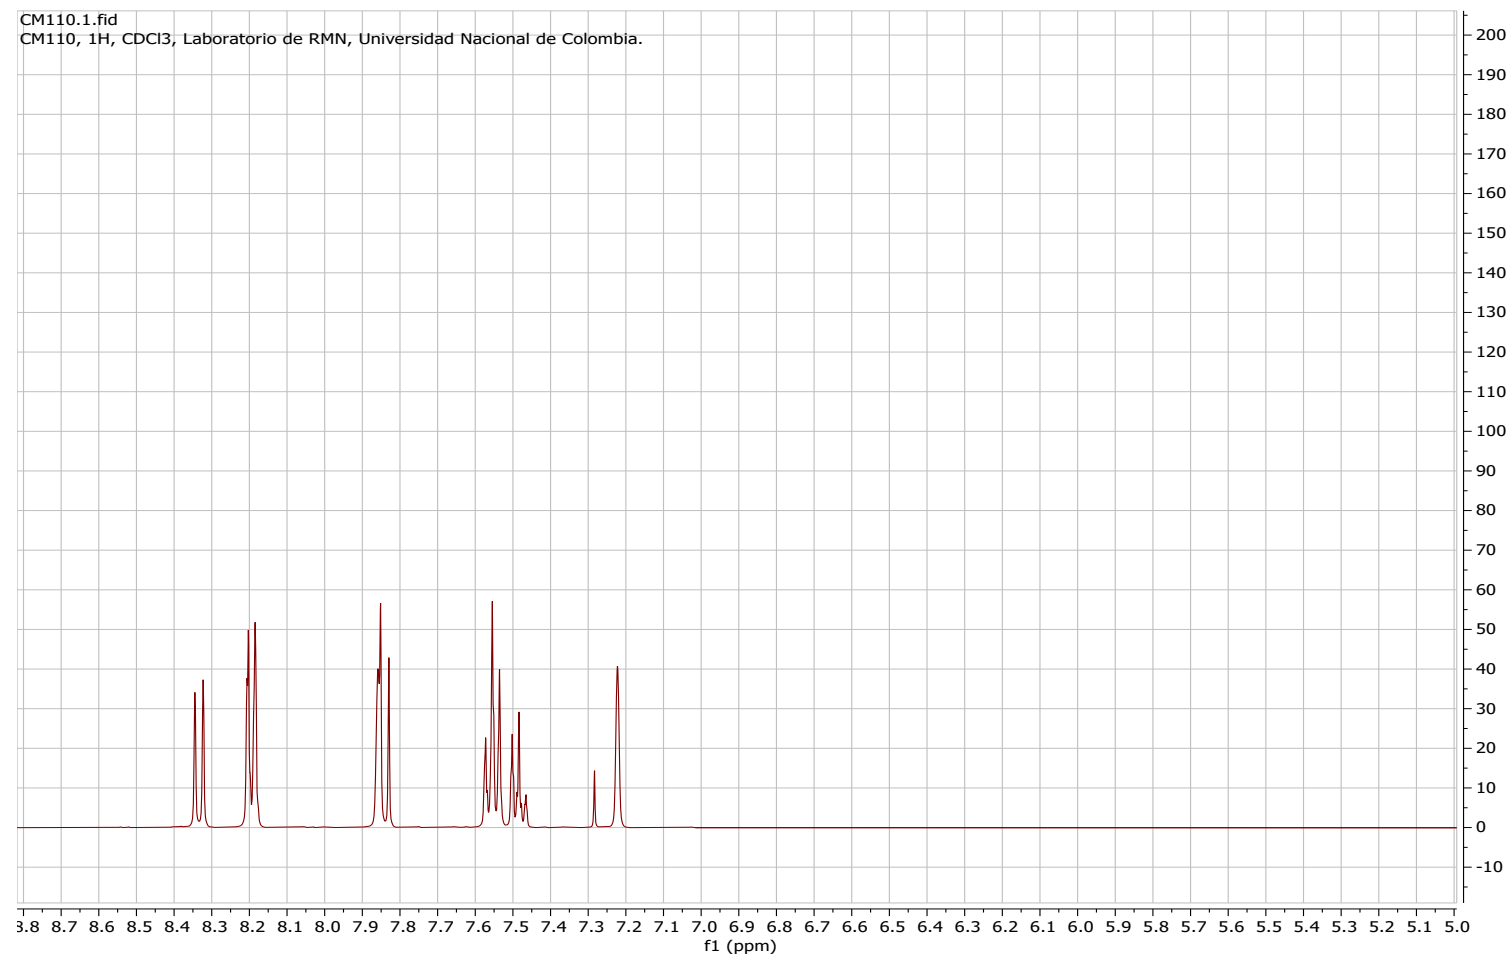

# <sup>13</sup>C NMR of 2-Phenylquinoline (4)

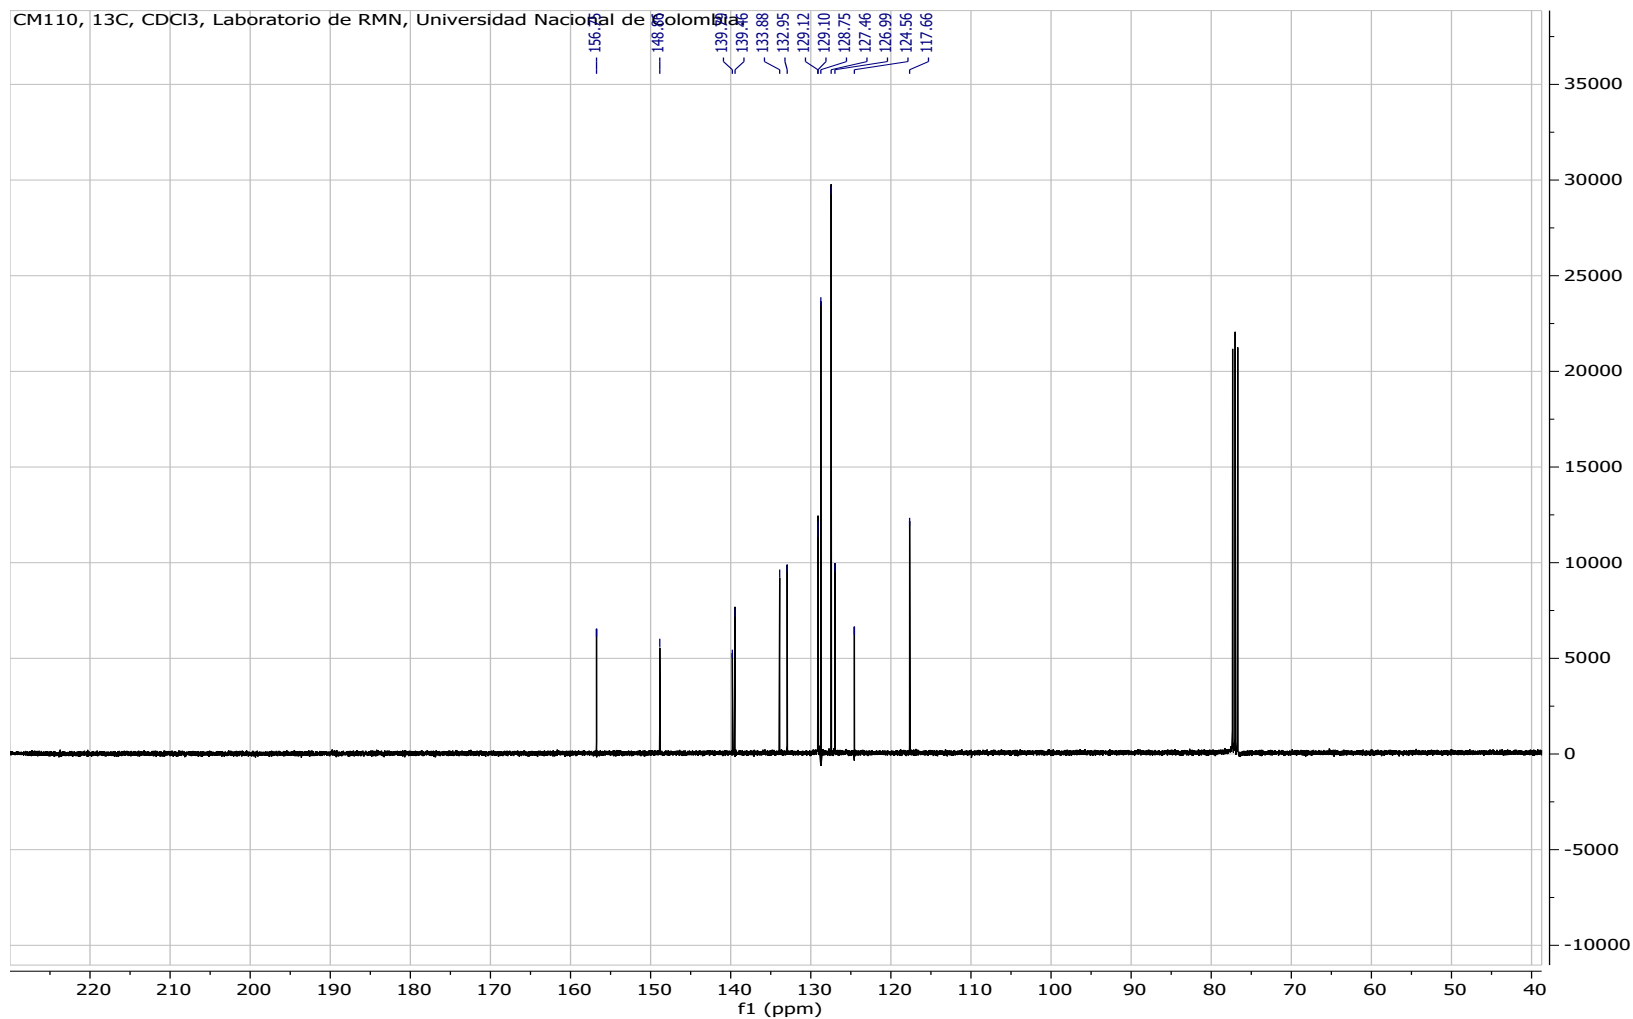

# <sup>1</sup>H NMR spectra of 6-Ethyl-2-phenylquinoline (5)

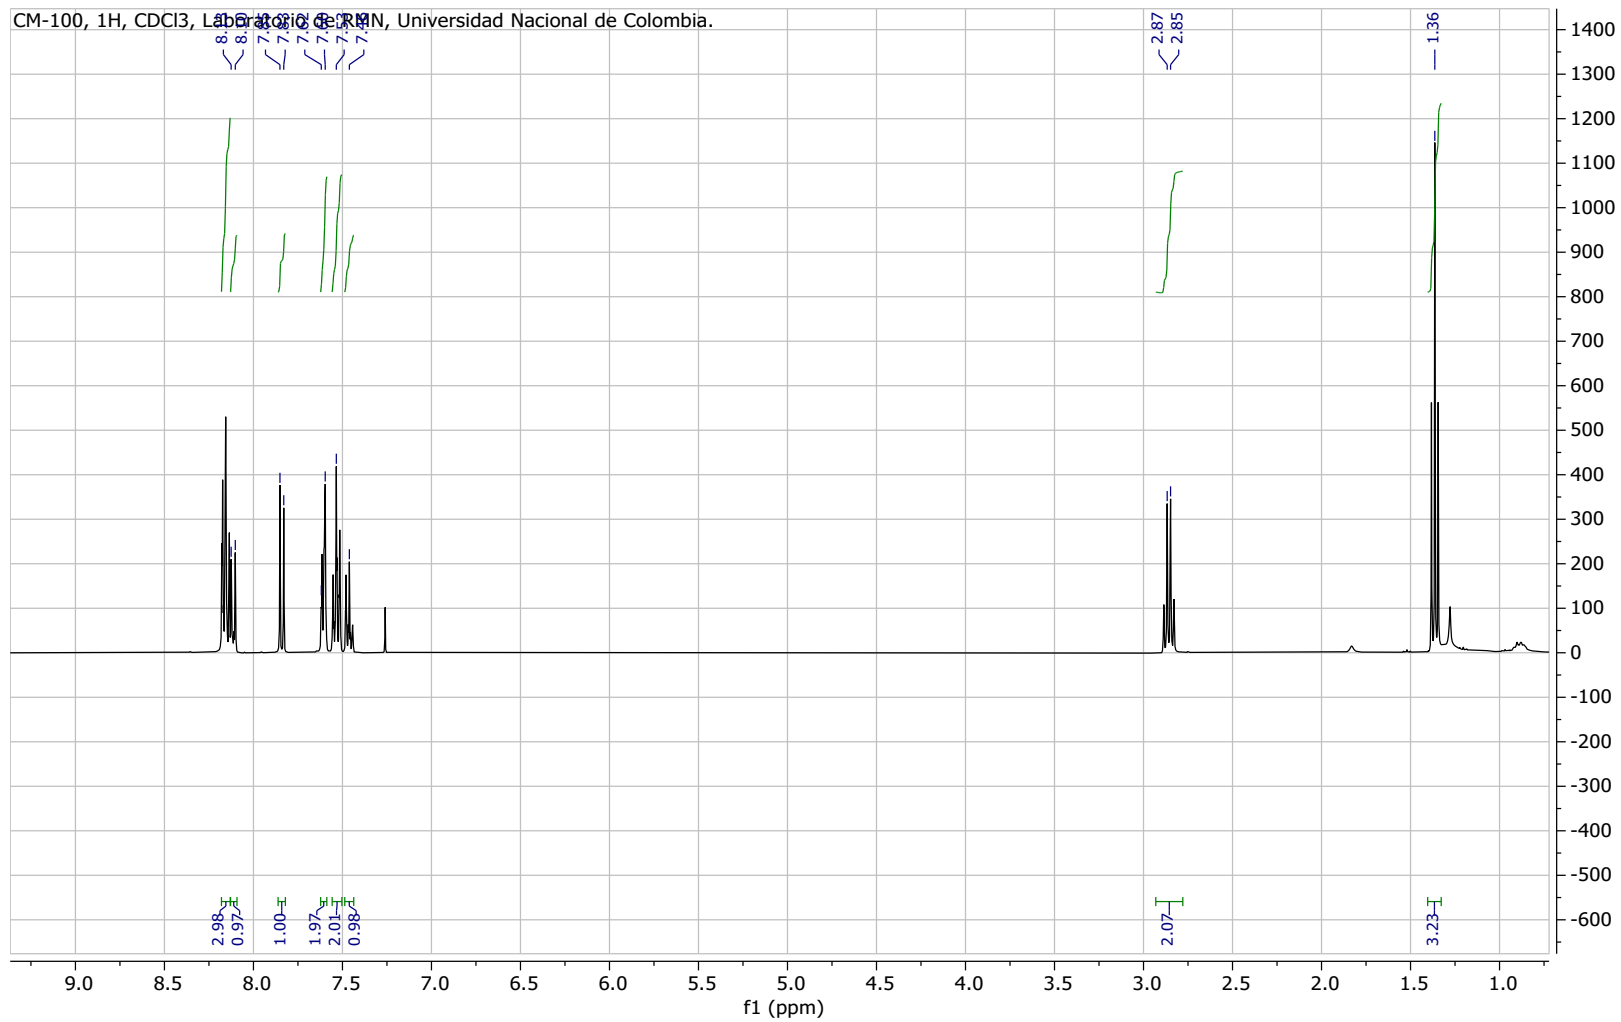

# <sup>13</sup>C NMR spectra of 6-Ethyl-2-phenylquinoline (5)

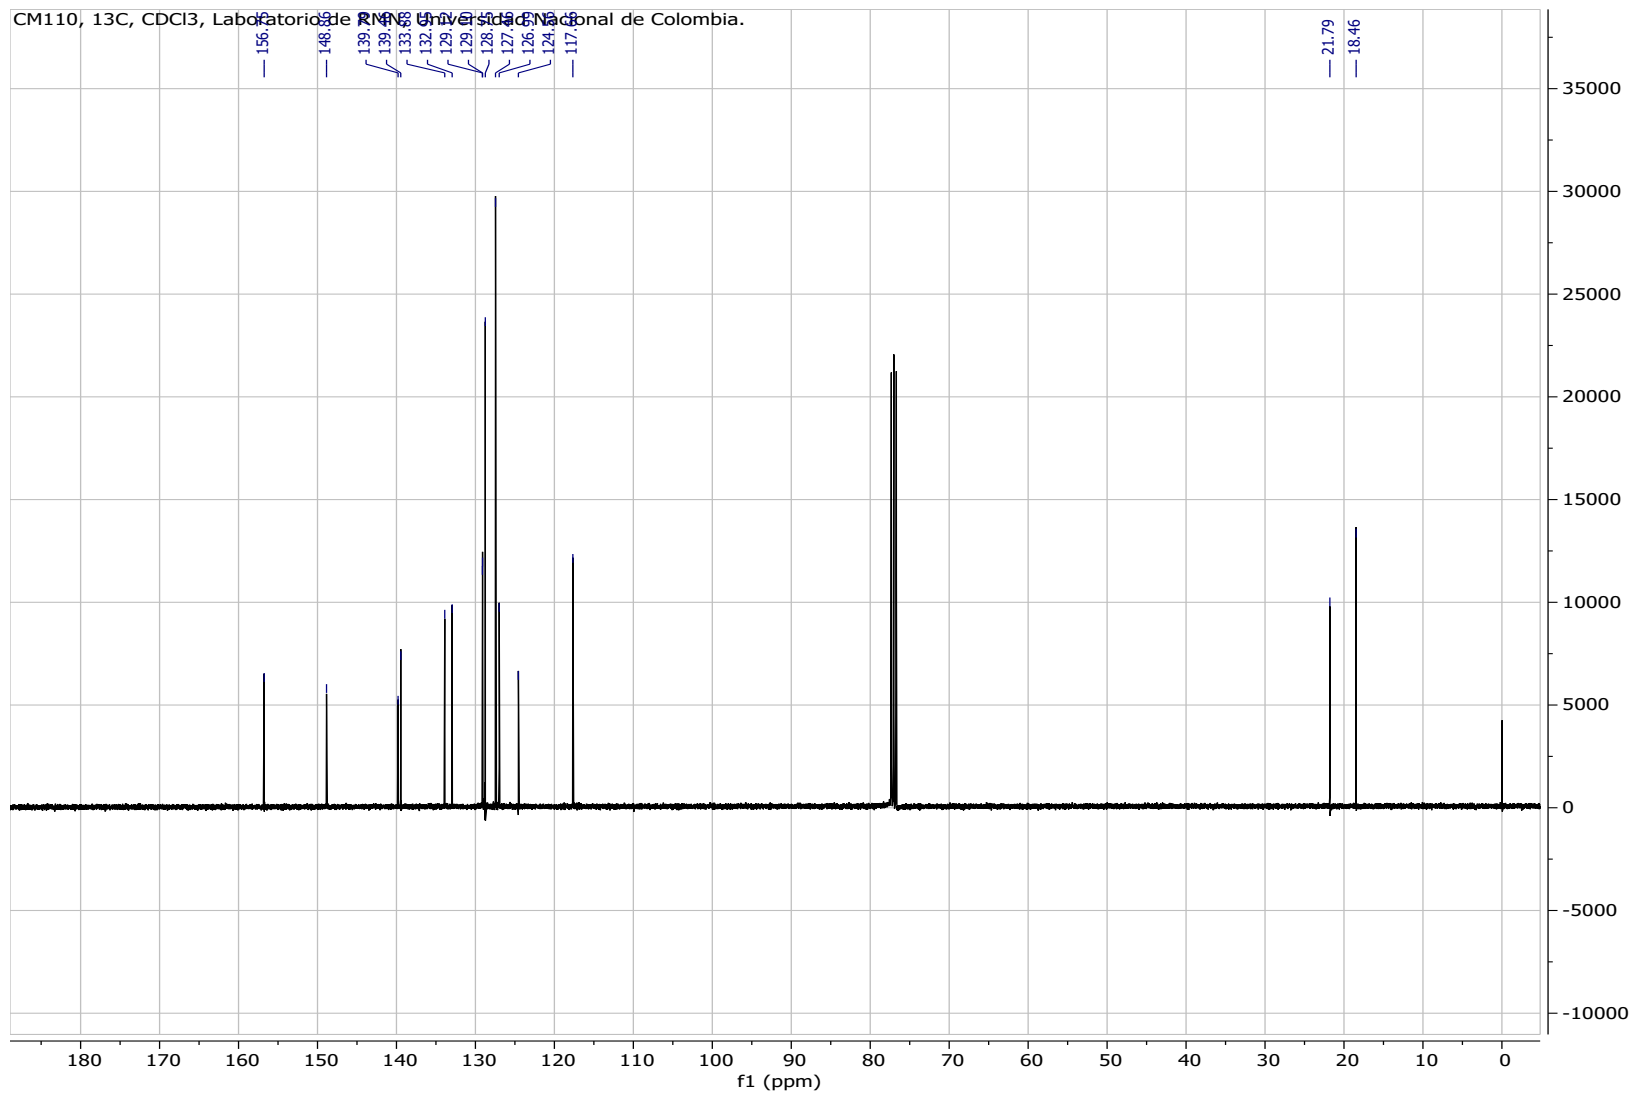

# <sup>1</sup>H NMR spectra of 6-Nitro-2-phenylquinoline (6)

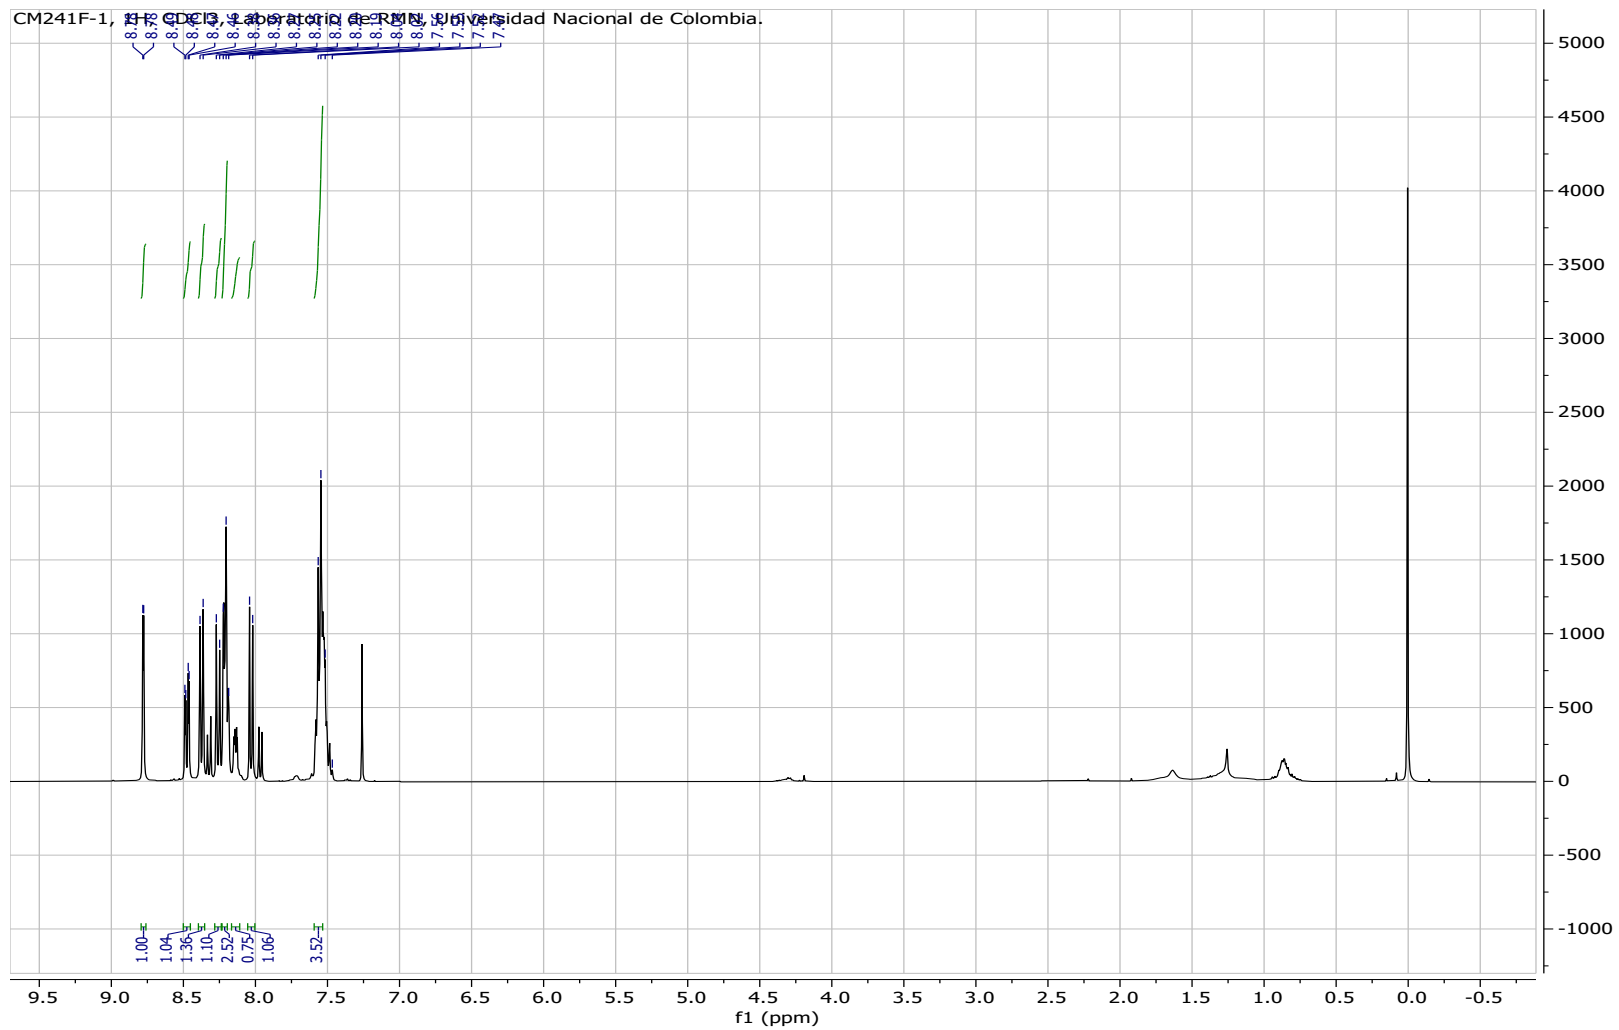

# <sup>13</sup>C NMR spectra of 6-Nitro-2-phenylquinoline (6)

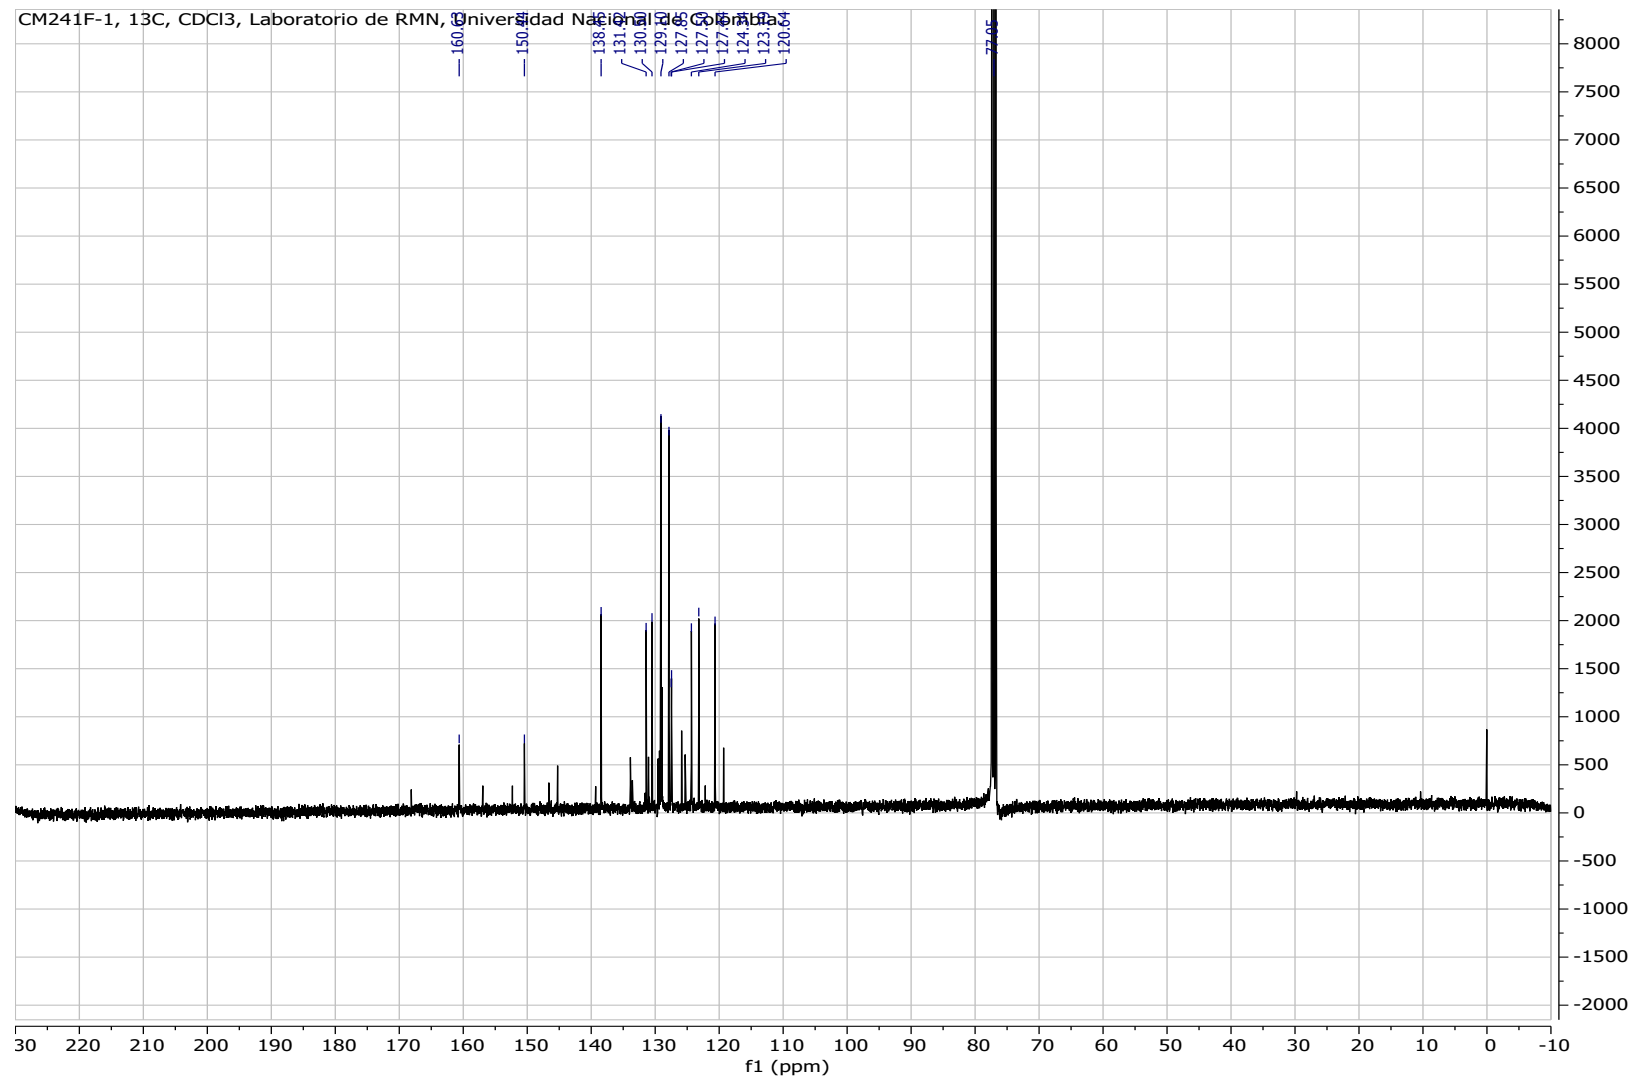

# <sup>1</sup>H NMR spectra of 6-Fluoro-2-phenylquinoline (7)

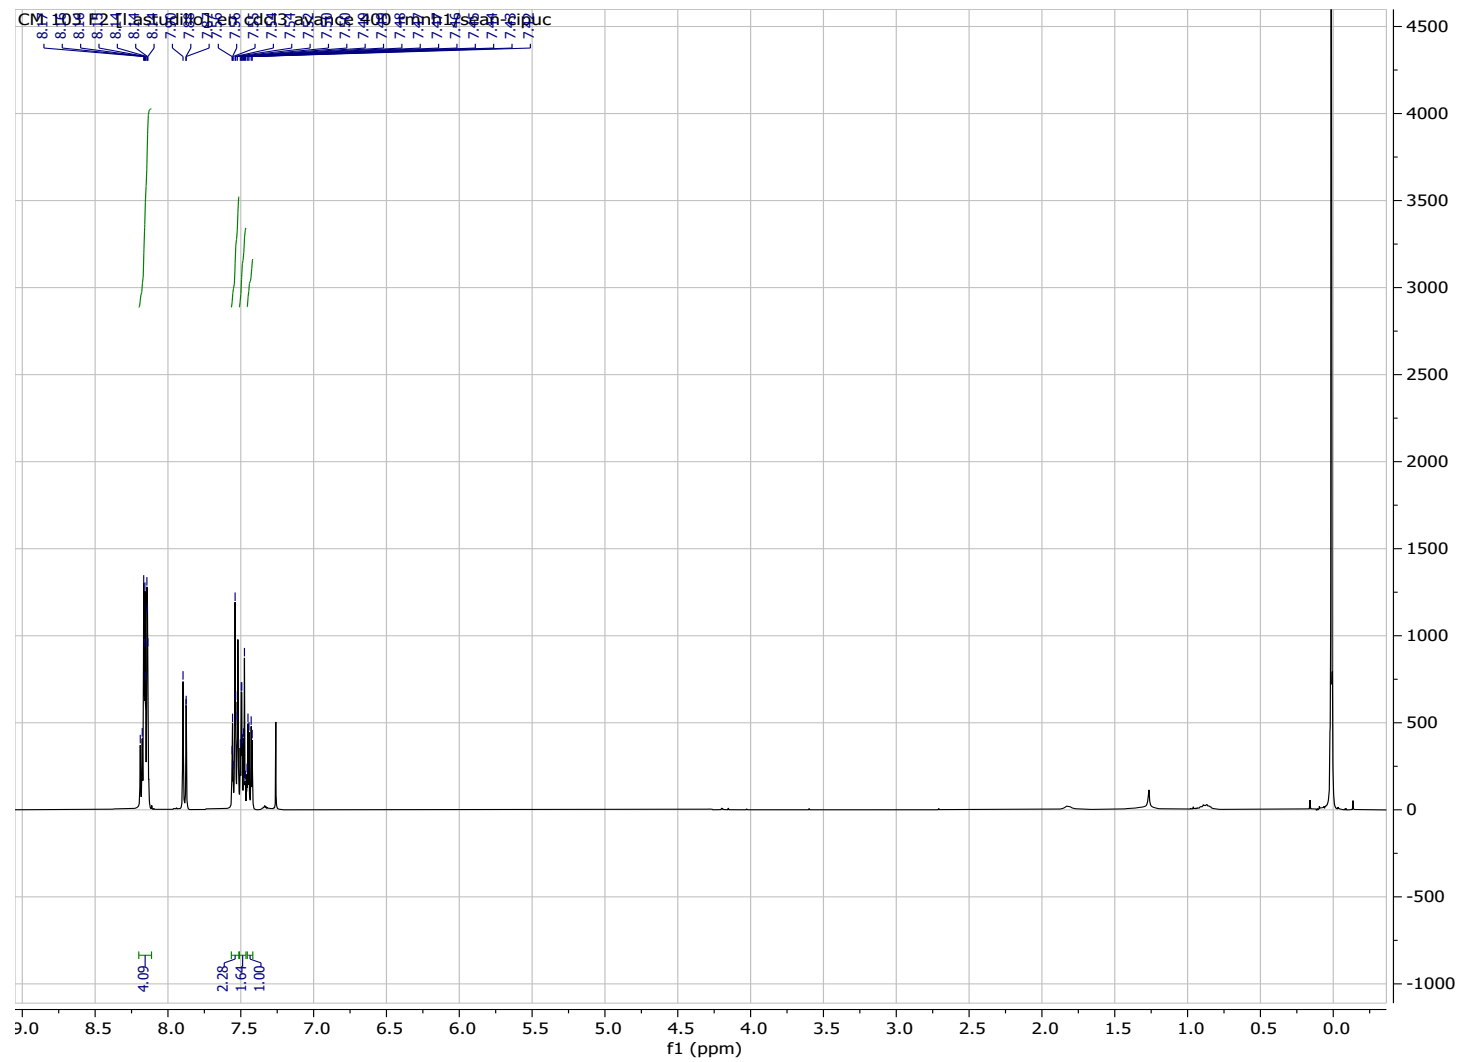

# <sup>13</sup>C NMR spectra of 6-Fluoro-2-phenylquinoline (7)

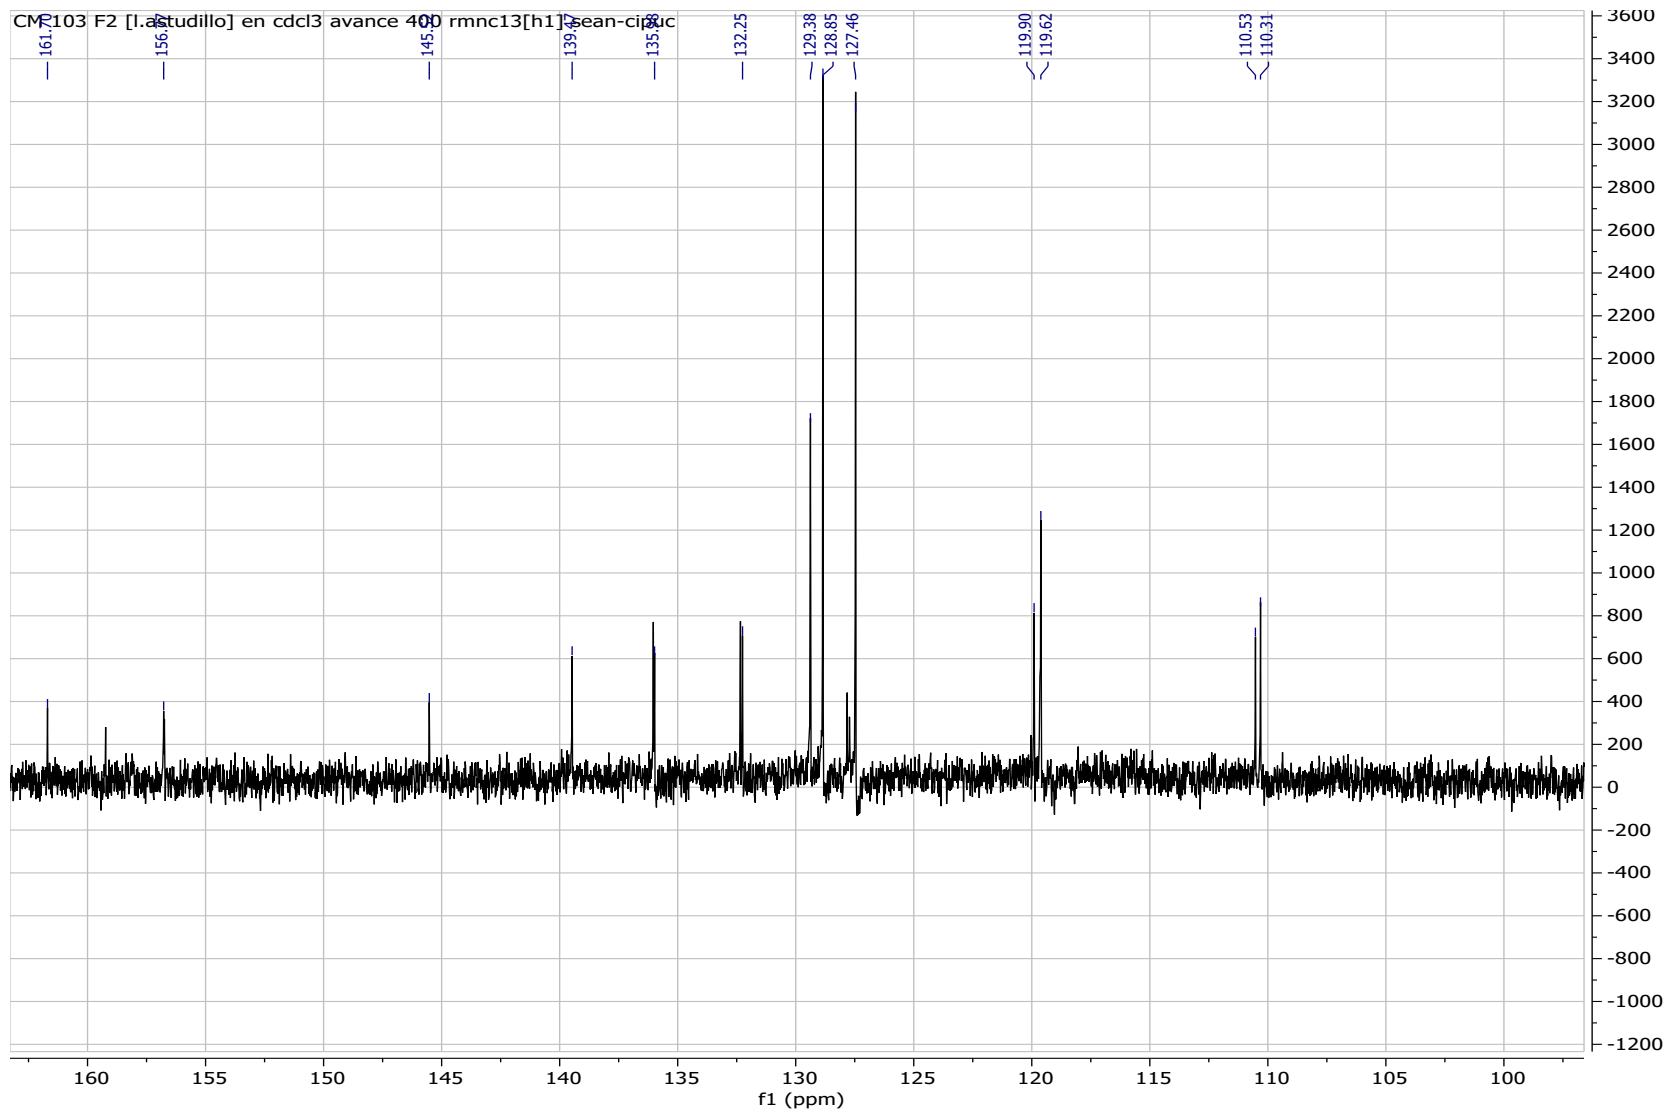



**COSY spectra of 6-Fluoro-2-phenylquinoline (7)**

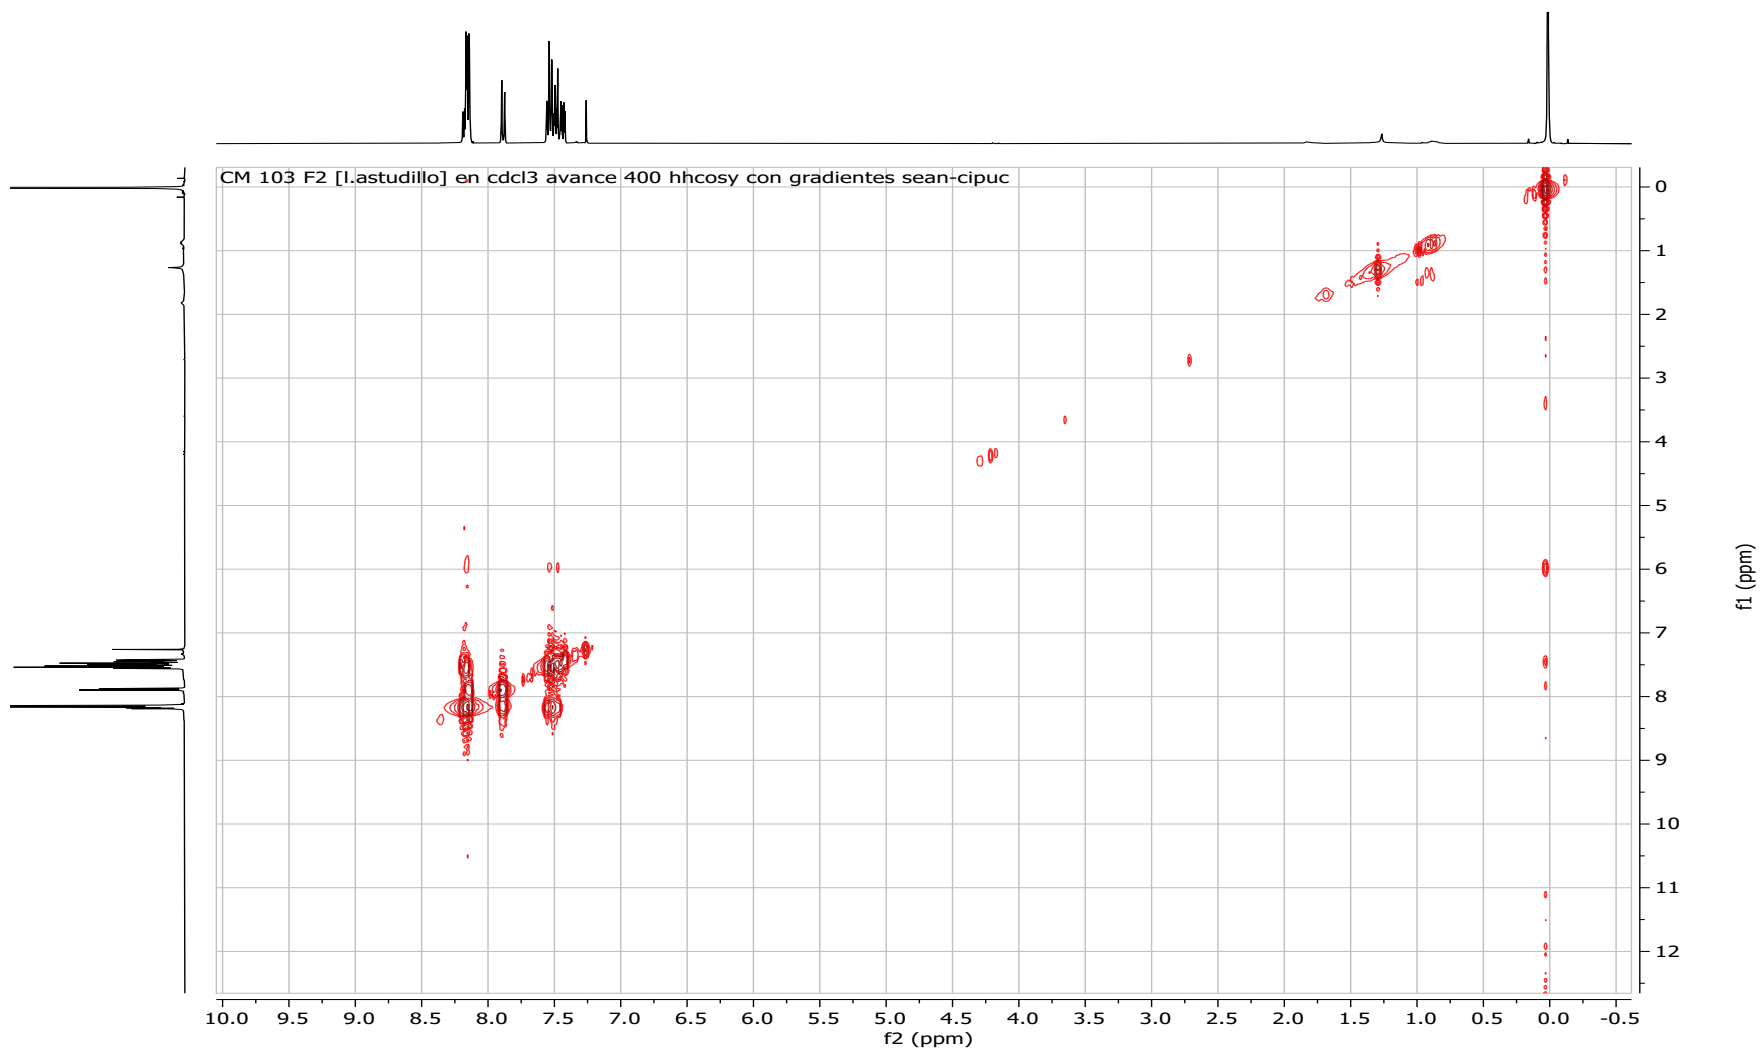

<sup>1</sup>H NMR spectra of 6-Chloro-2-phenylquinoline (8)

CM240F-1, 1H, CDCl3, Laboratorio de RMN, Universidad Nacional de Colombia.

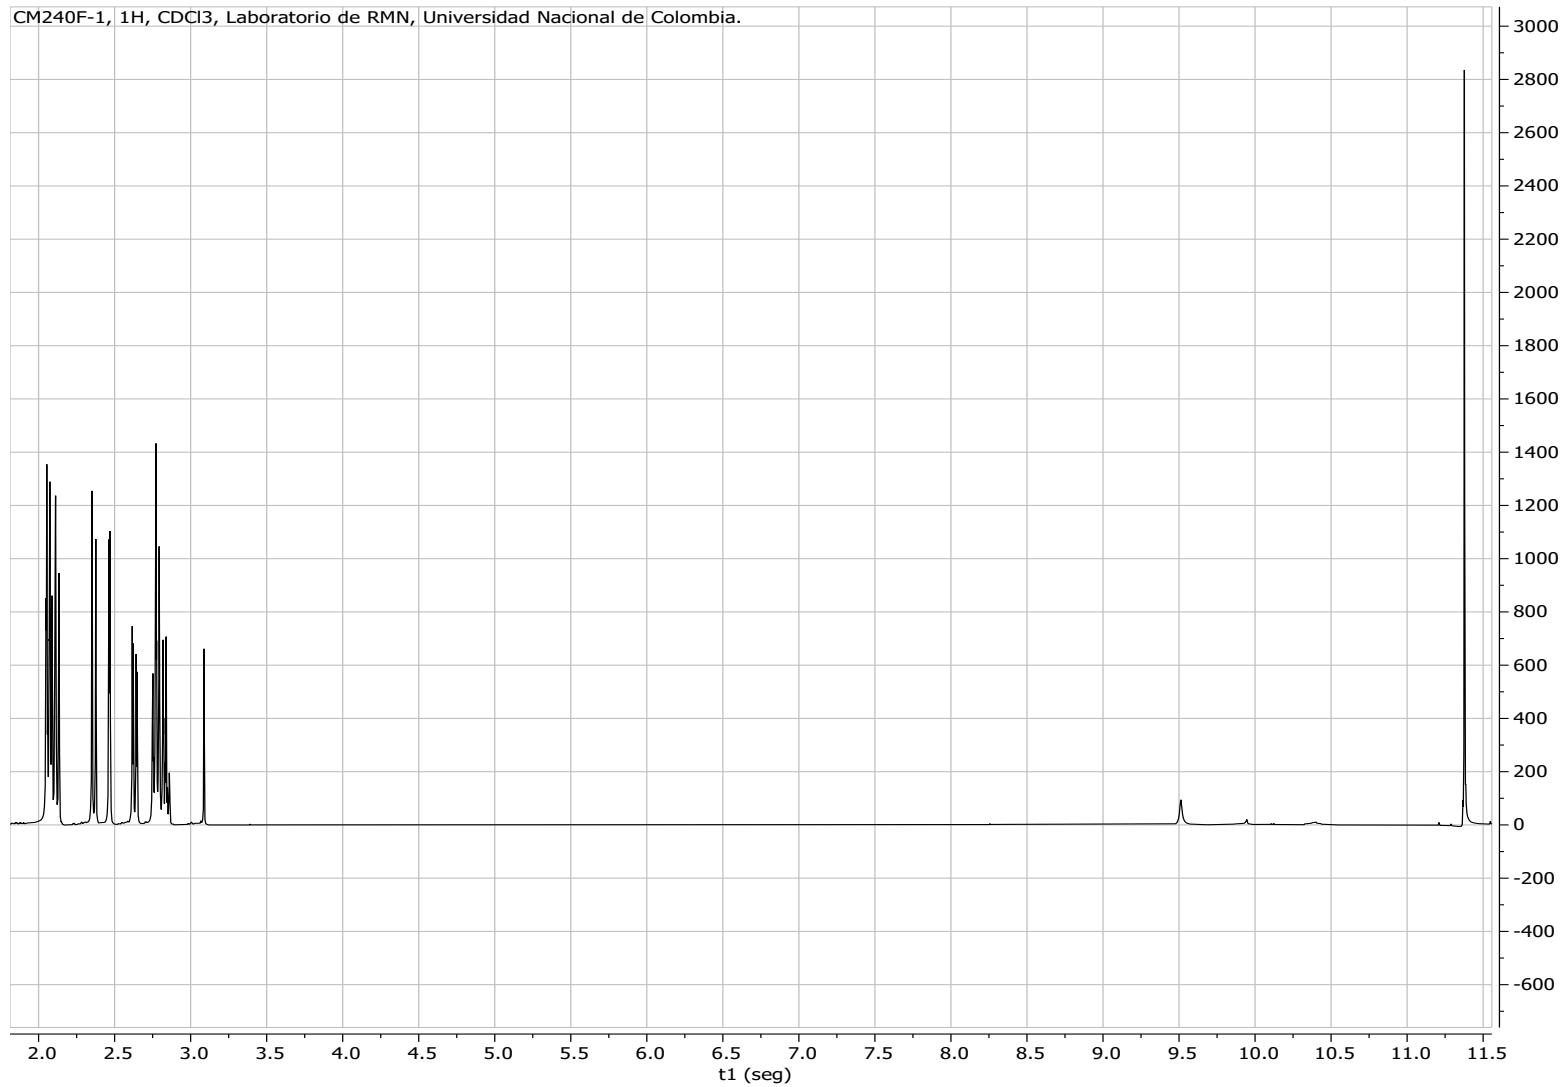

**$^{13}\text{C}$  NMR spectra of 6-Chloro-2-phenylquinoline (8)**

CM240F-1, <sup>13</sup>C, CDCl<sub>3</sub>, Laboratorio de RMN, Universidad Nacional de Colombia.

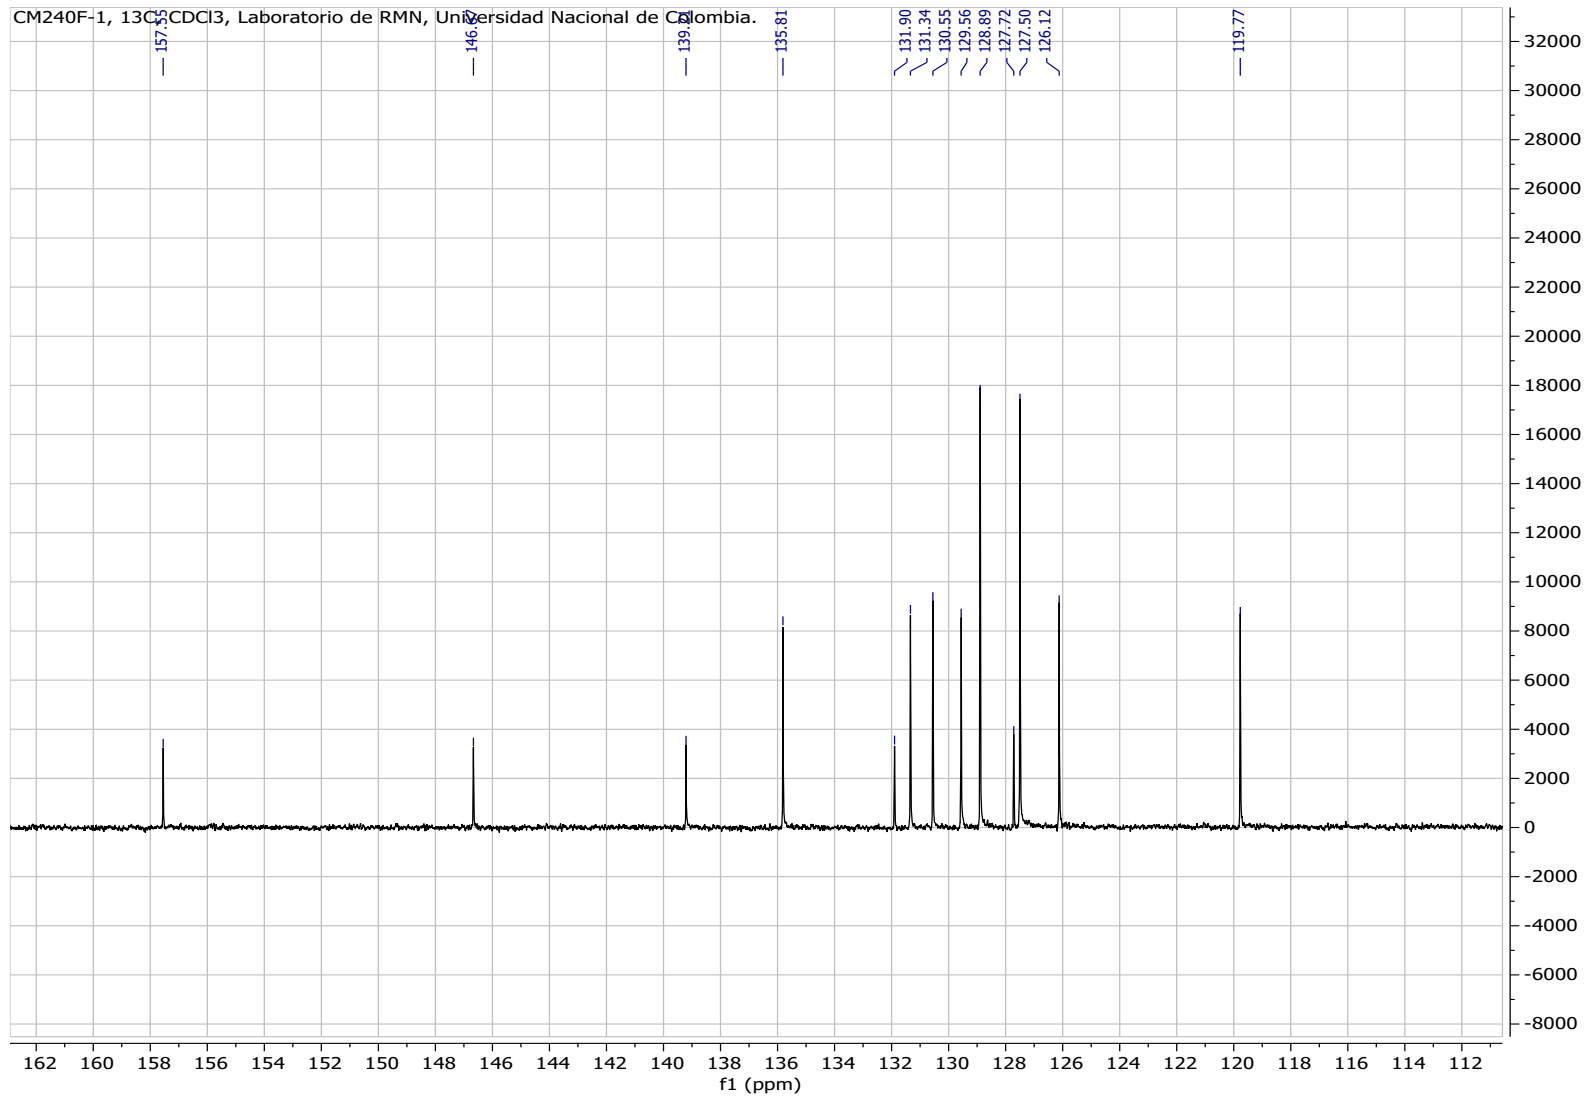

**<sup>1</sup>H NMR spectra of 6,7-methylenedioxy-2-Phenylquinoline (10)**

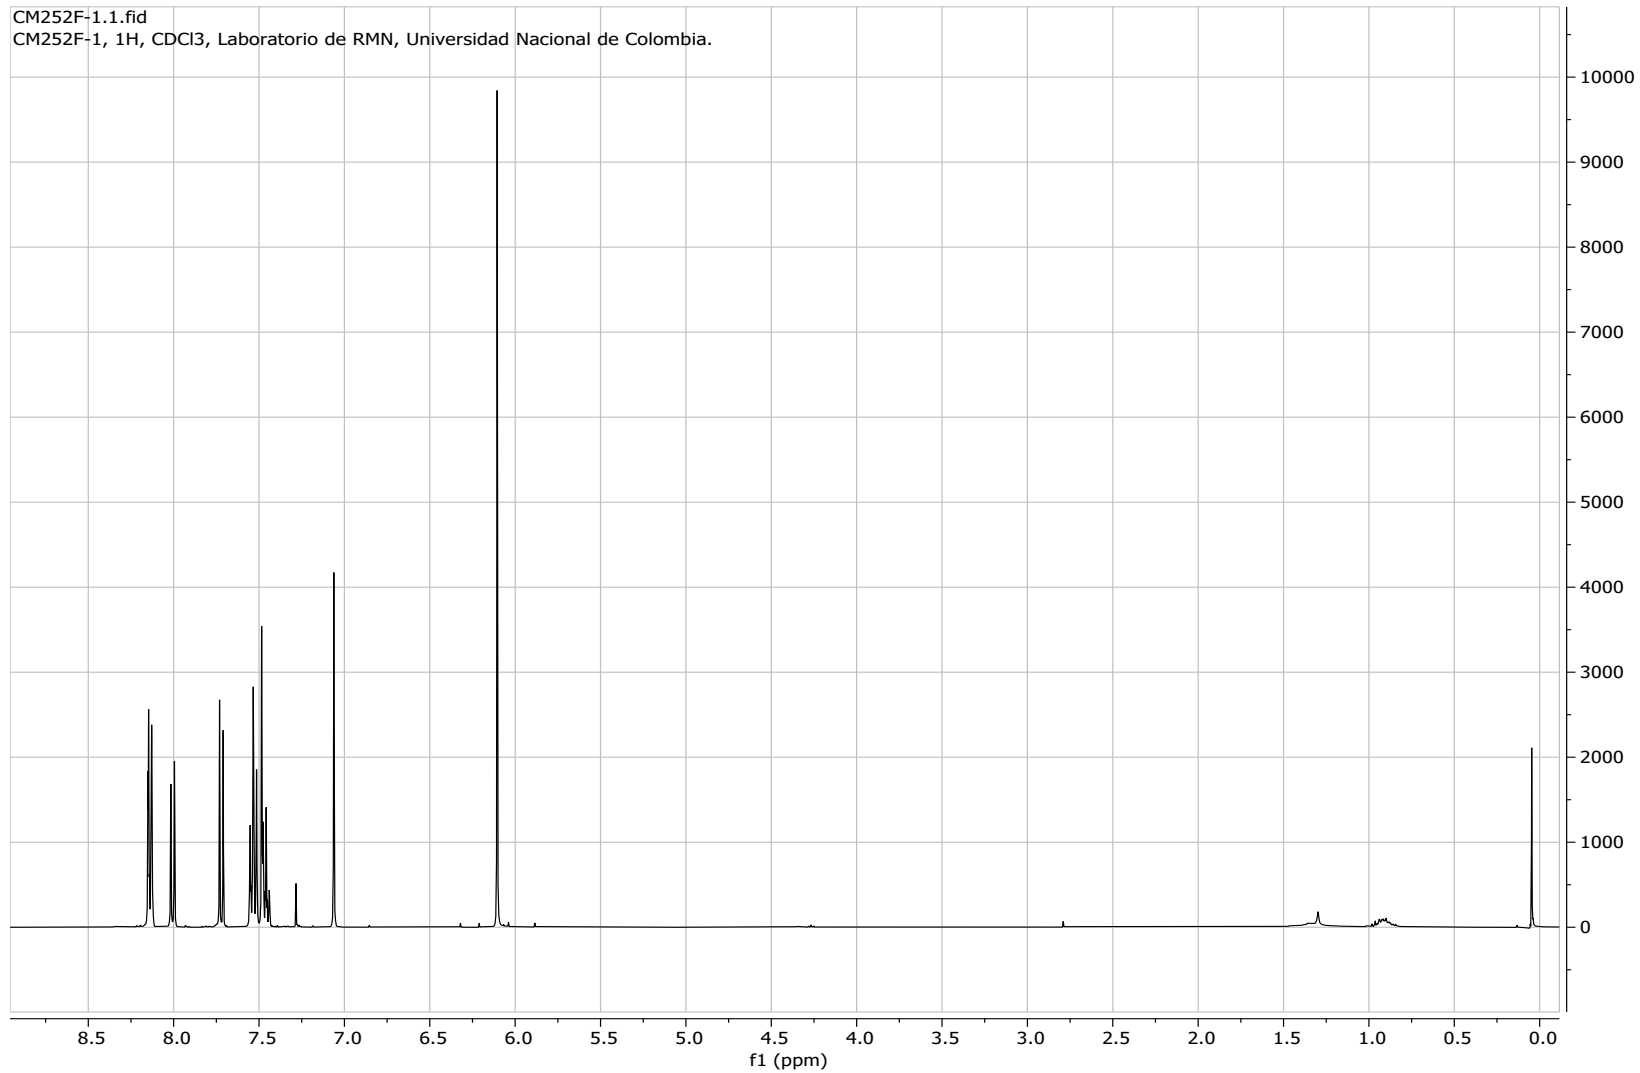

**$^{13}\text{C}$  NMR spectra of 6,7-methylenedioxy-2-Phenylquinoline (10)**

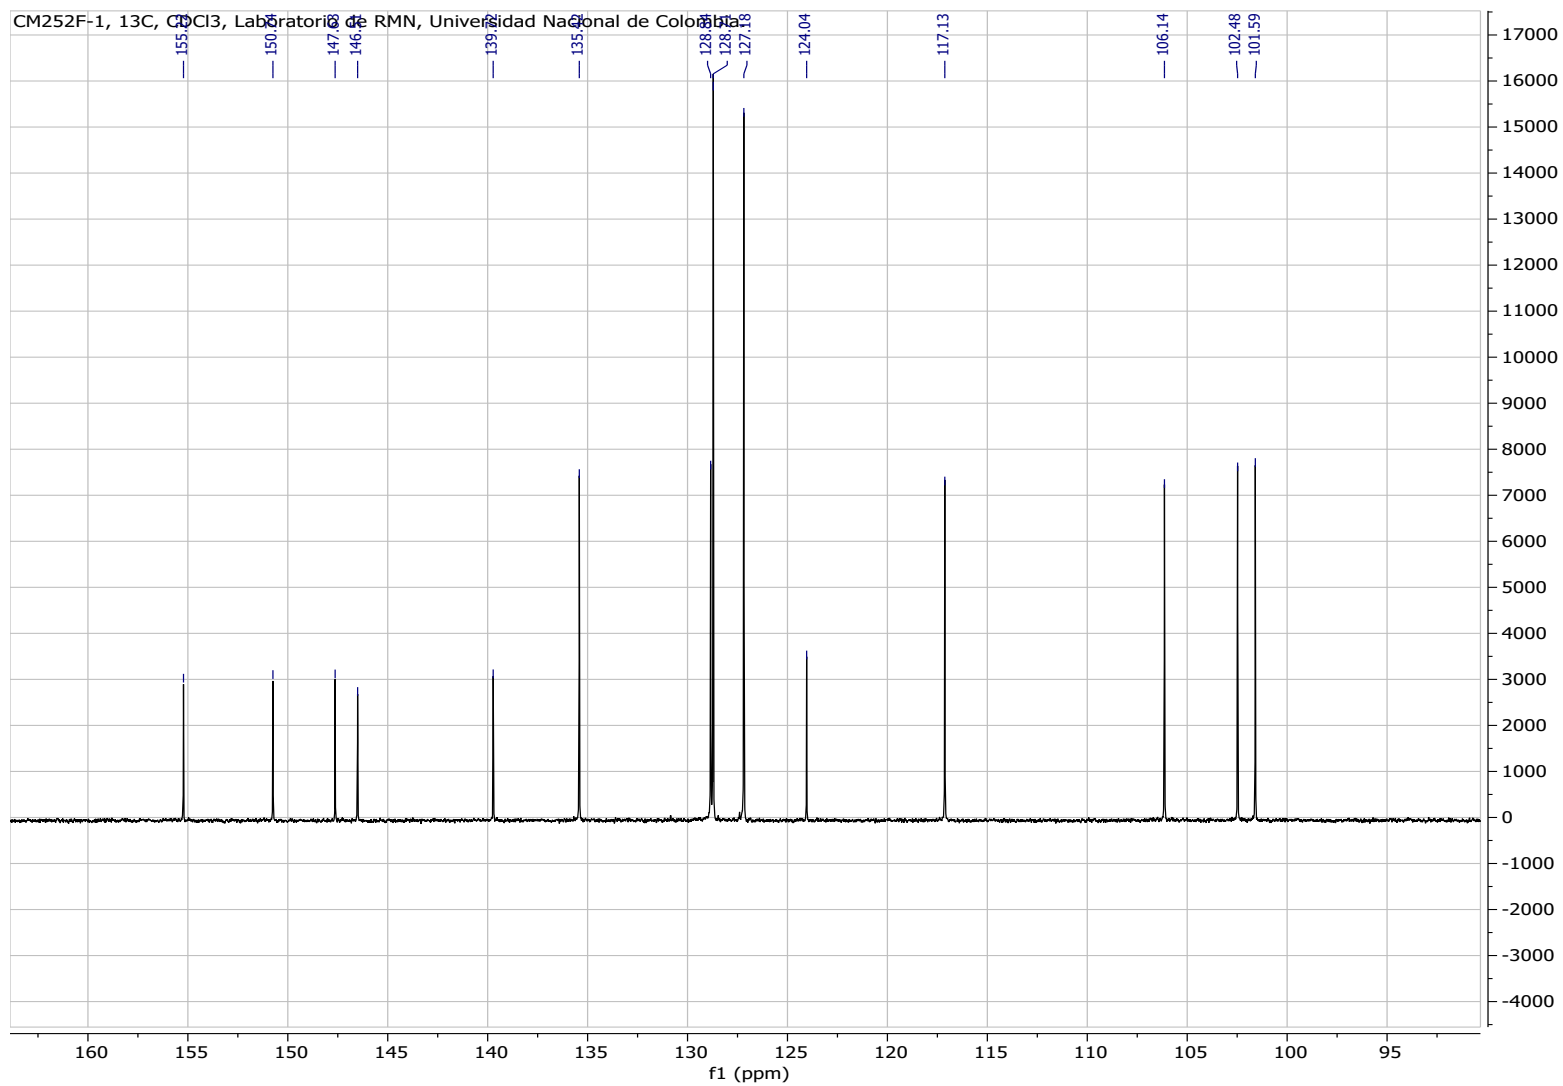

**<sup>1</sup>H NMR spectra of 2-(Phenyl-3',4'-dioxomethylen)-quinoline (11)**

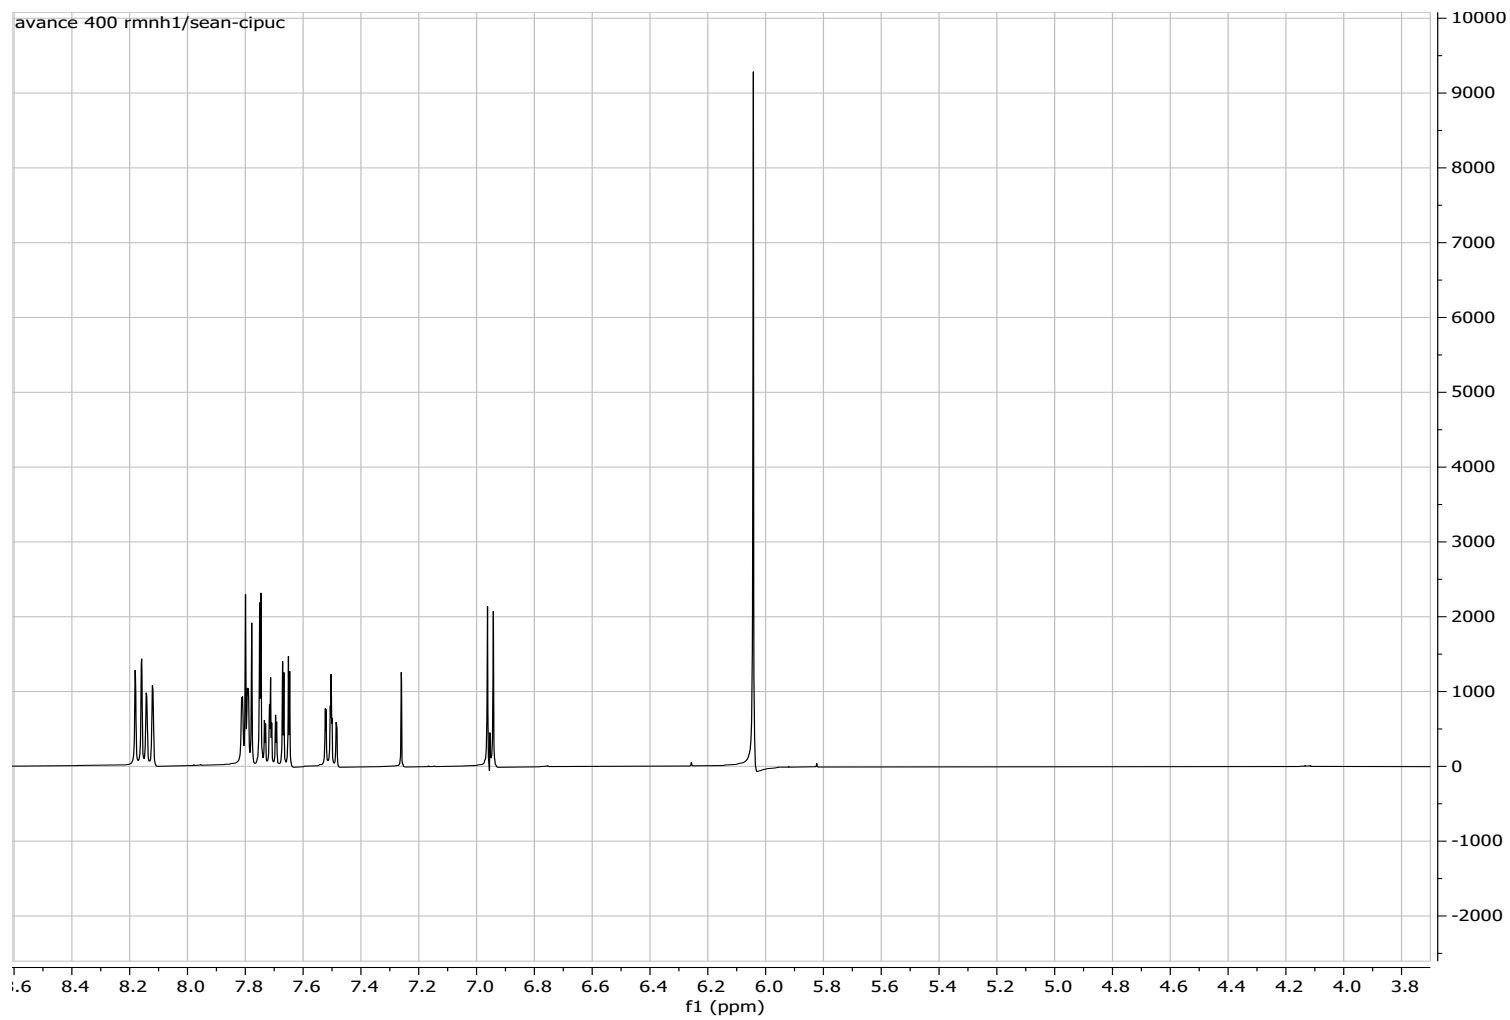

**$^{13}\text{C}$  NMR spectra of 2-(Phenyl-3',4'-dioxomethylen)-quinoline (11)**



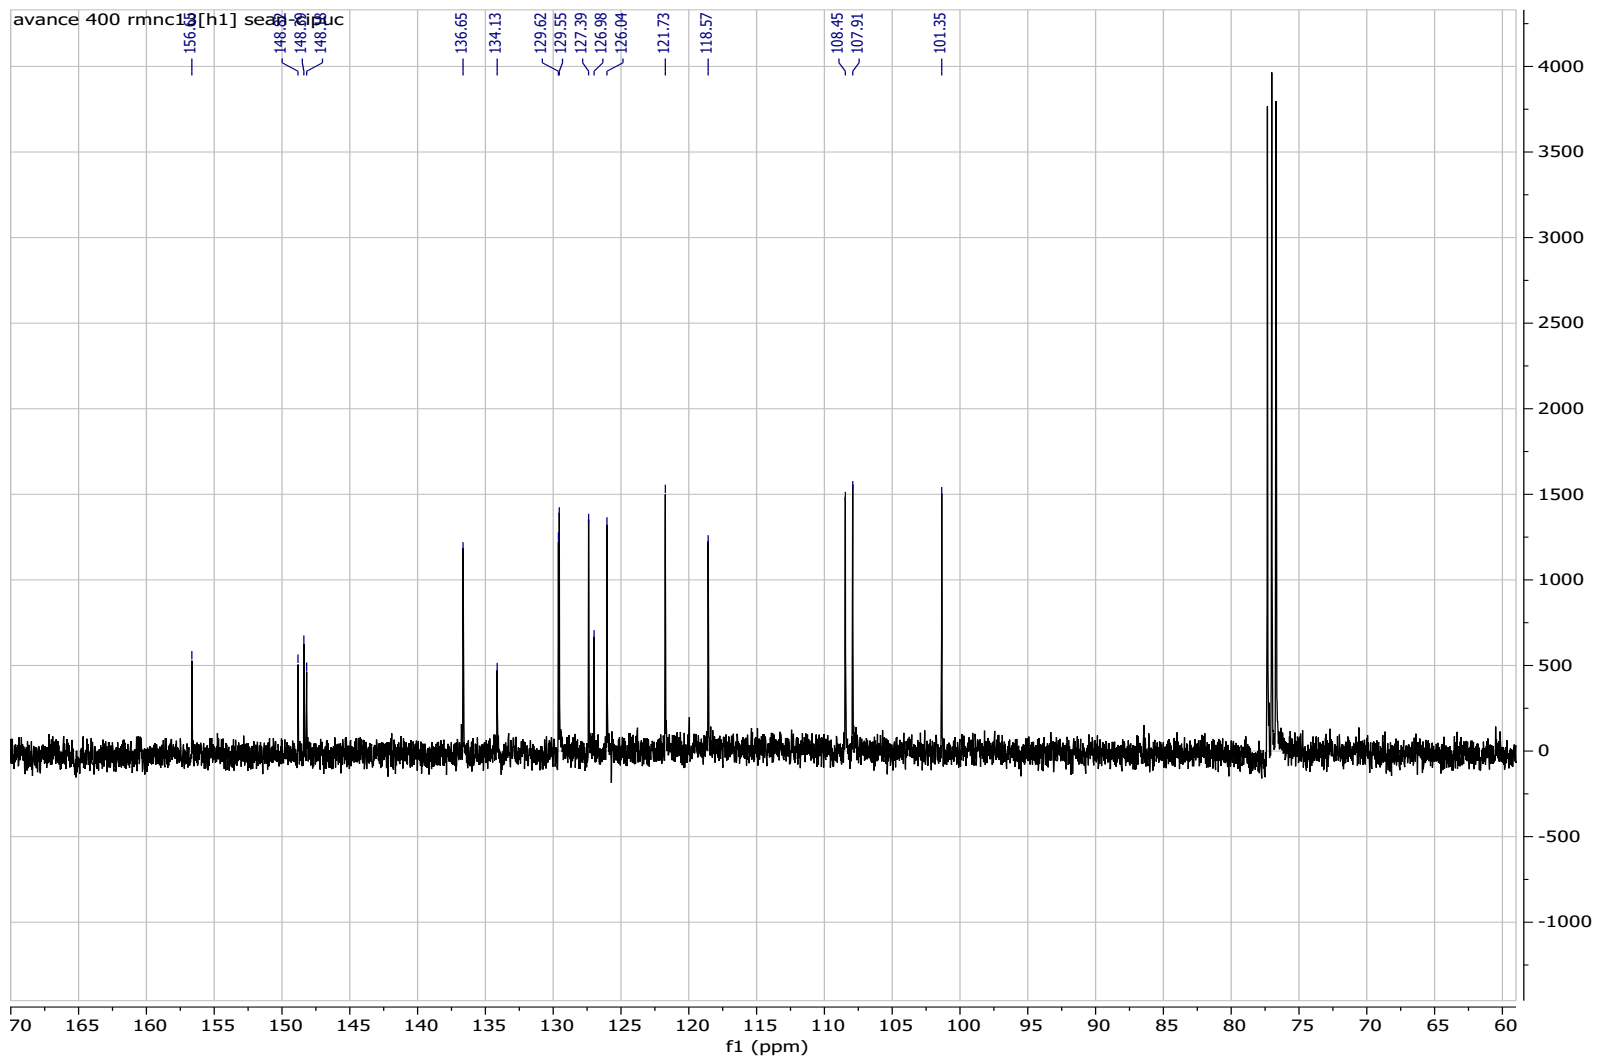

**<sup>13</sup>C NMR spectra of 2-(Phenyl-3',4'-dioxomethylen)-6-methoxyquinoline (13)**

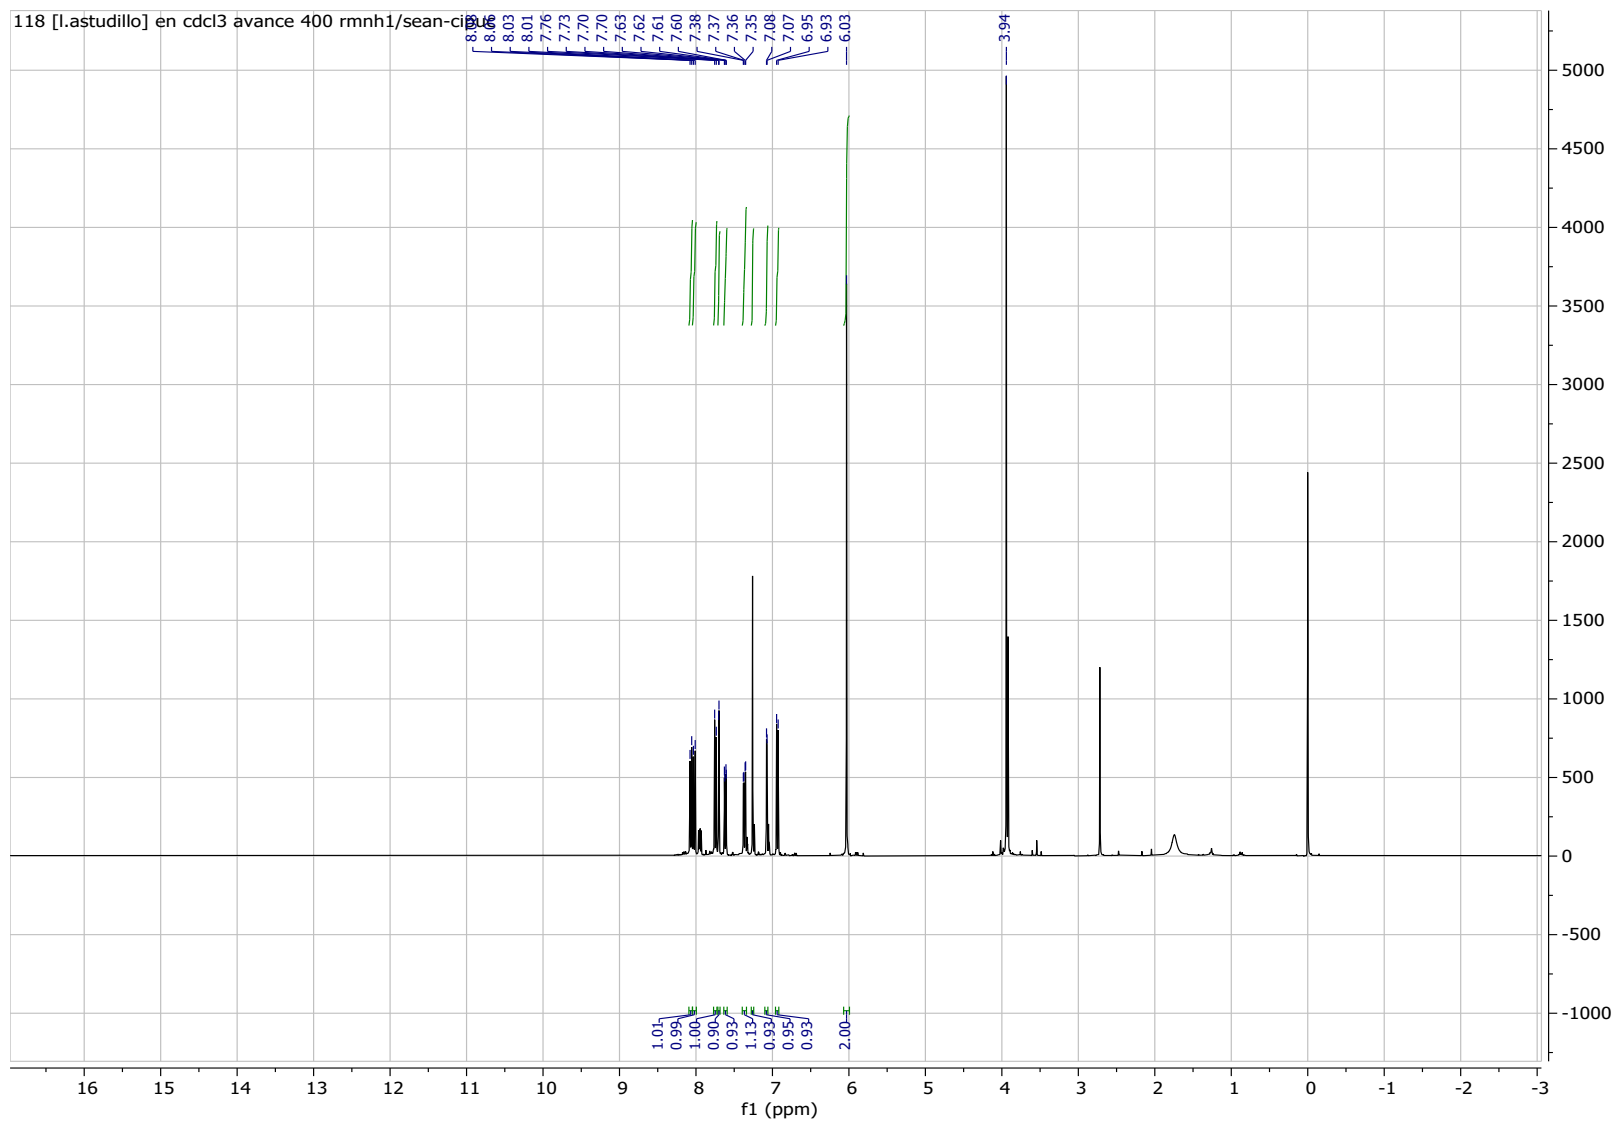

**<sup>1</sup>H NMR spectra of 2-(Phenyl-3',4'-dioxomethylen)-6,8-dimethoxyquinoline (15)**

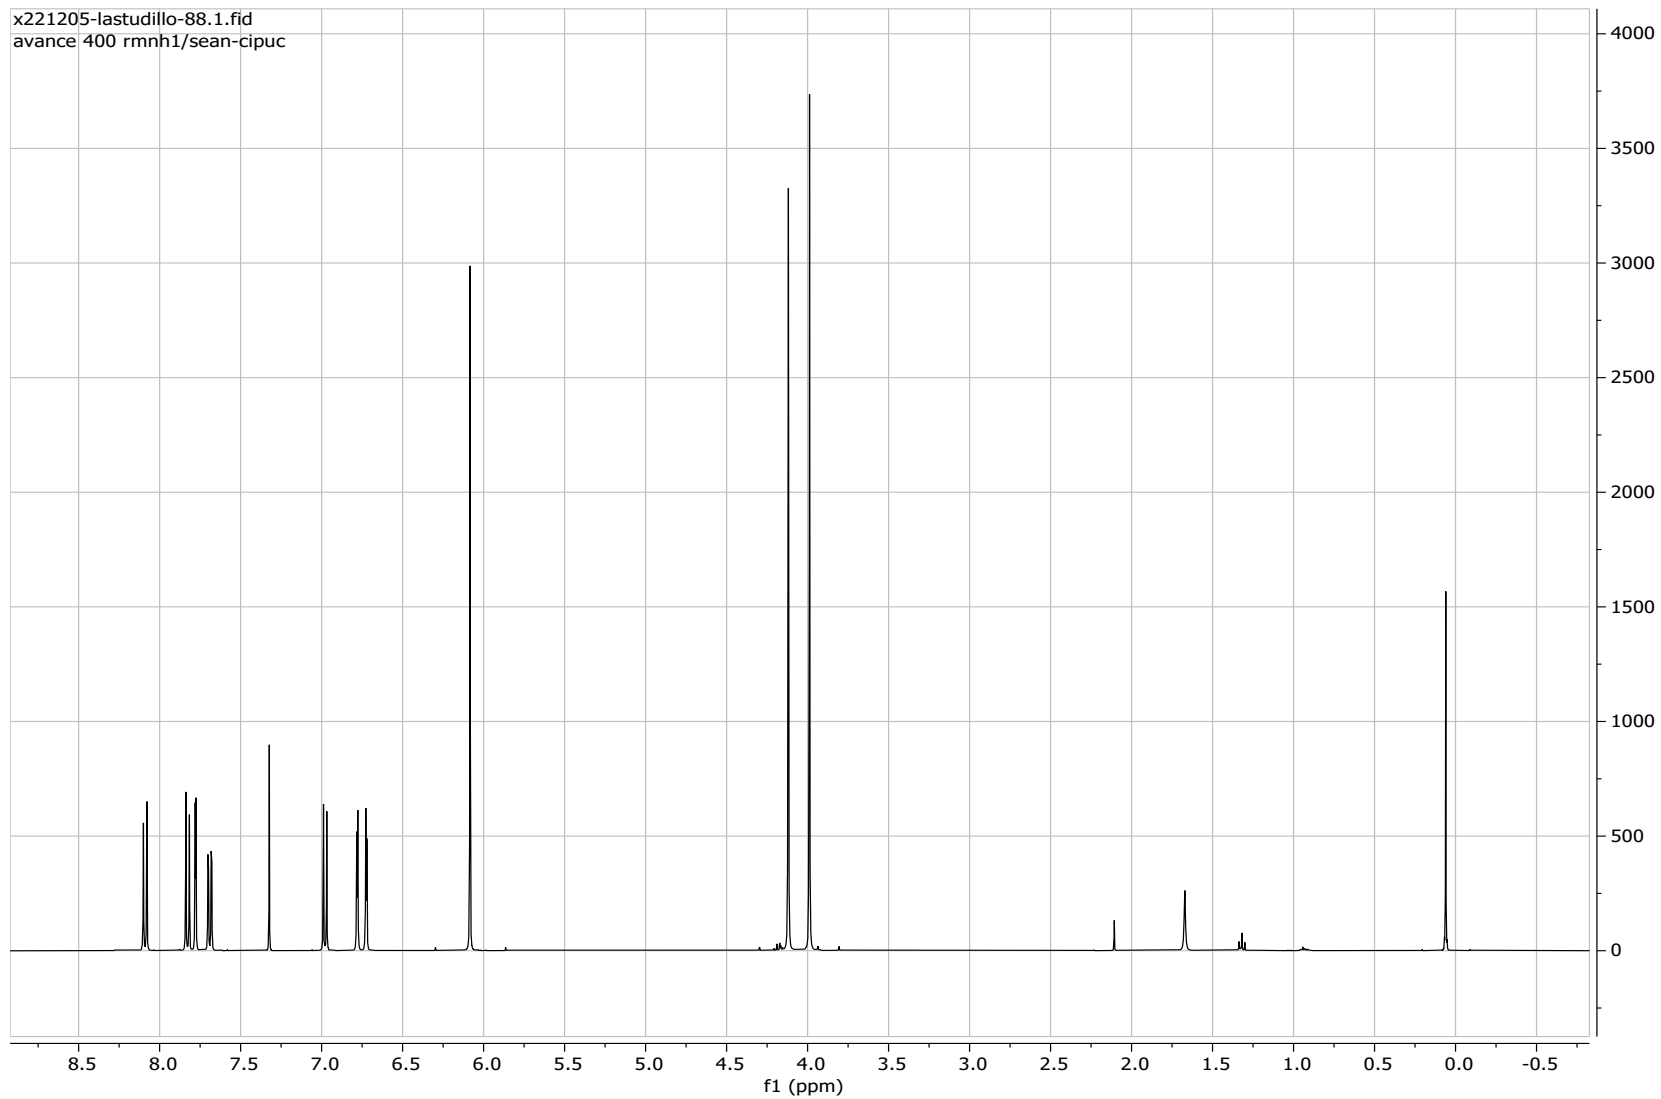

**$^{13}\text{C}$  NMR spectra of 2-(Phenyl-3',4'-dioxomethylen)-6,8-dimethoxyquinoline (15)**

avance 400 rmnc13[h1] sean-cipuc

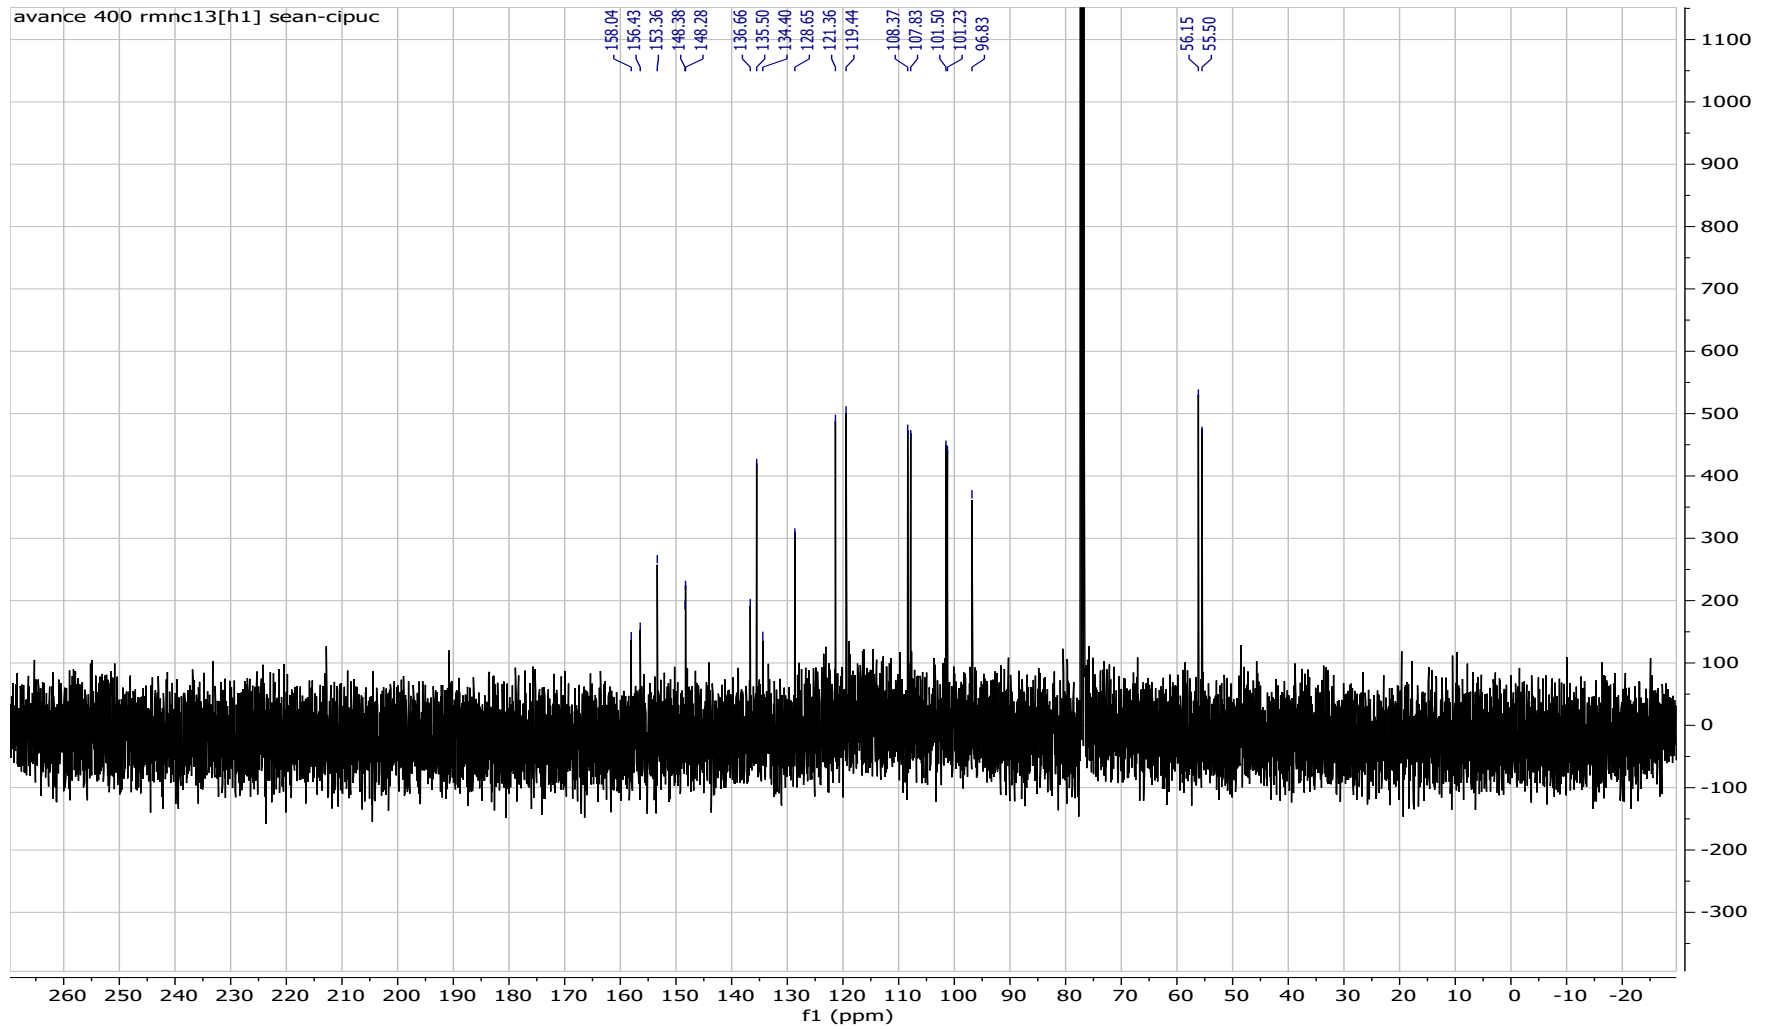

# <sup>1</sup>H NMR spectra of 2-(Phenyl-3',4'-dioxomethylen)-5,8-dimethylquinoline (16)

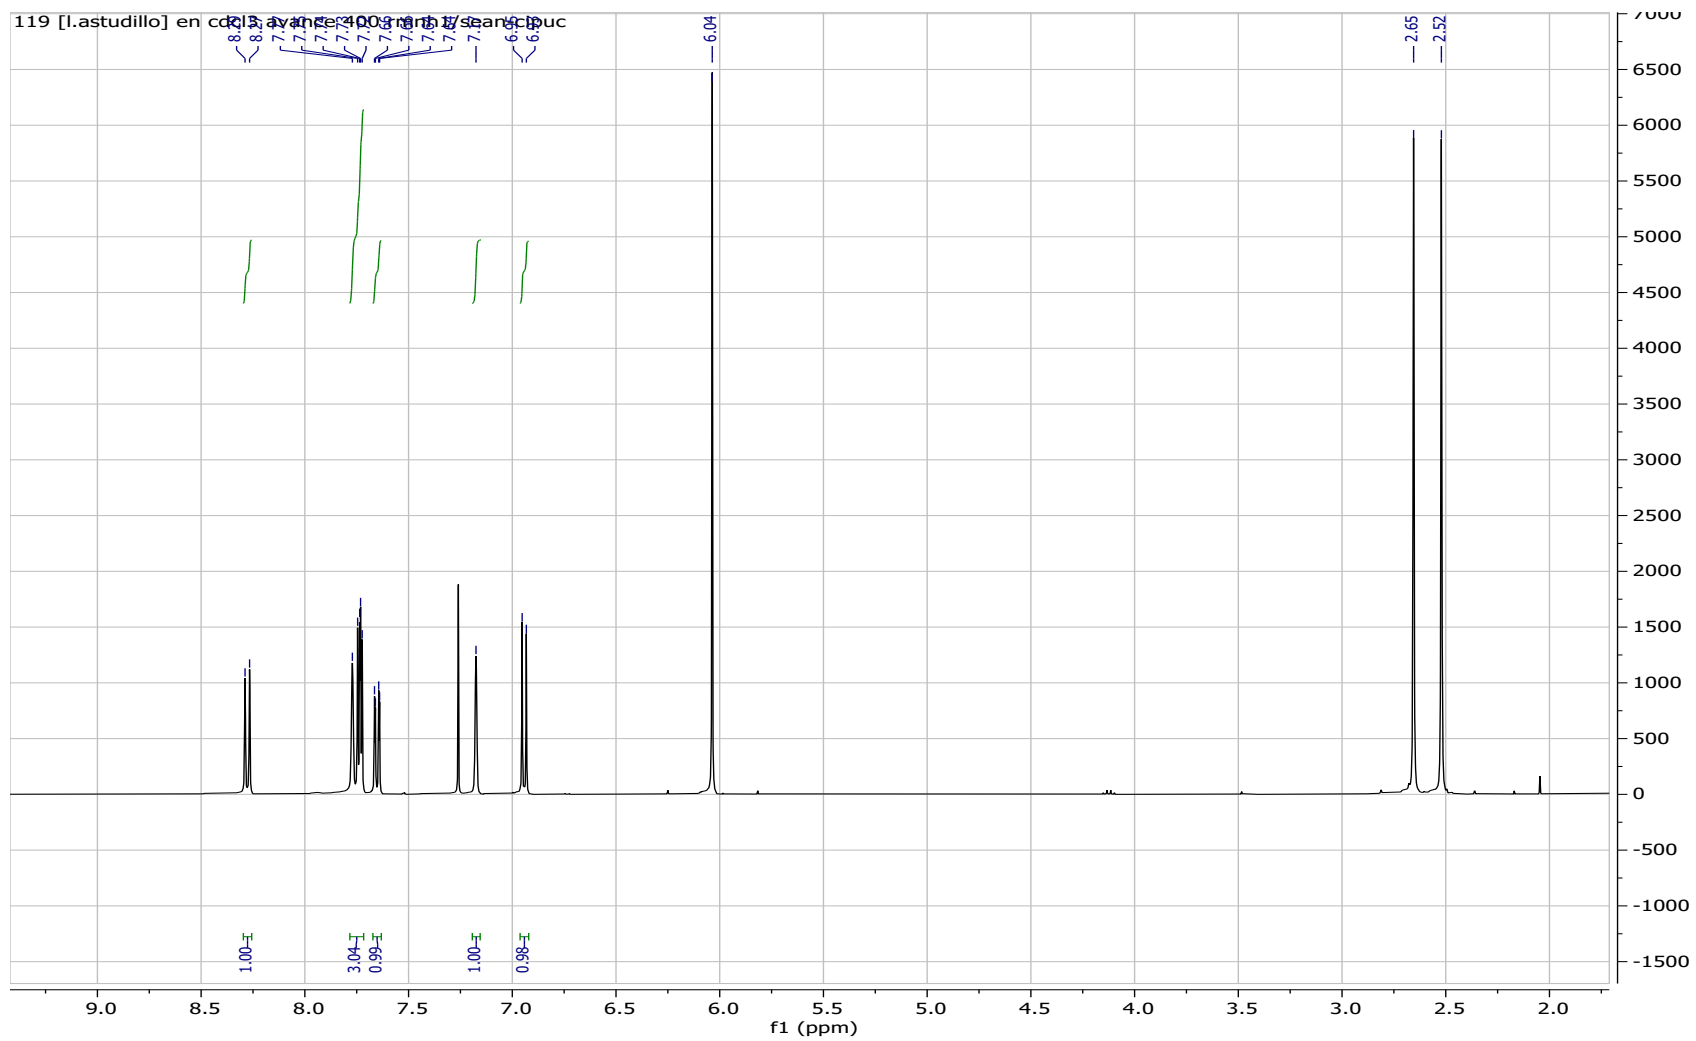

# <sup>1</sup>H NMR spectra of N-(2-Methyl-1,2,3,4-tetrahydroquinolin-4-yl)acetamide (17)

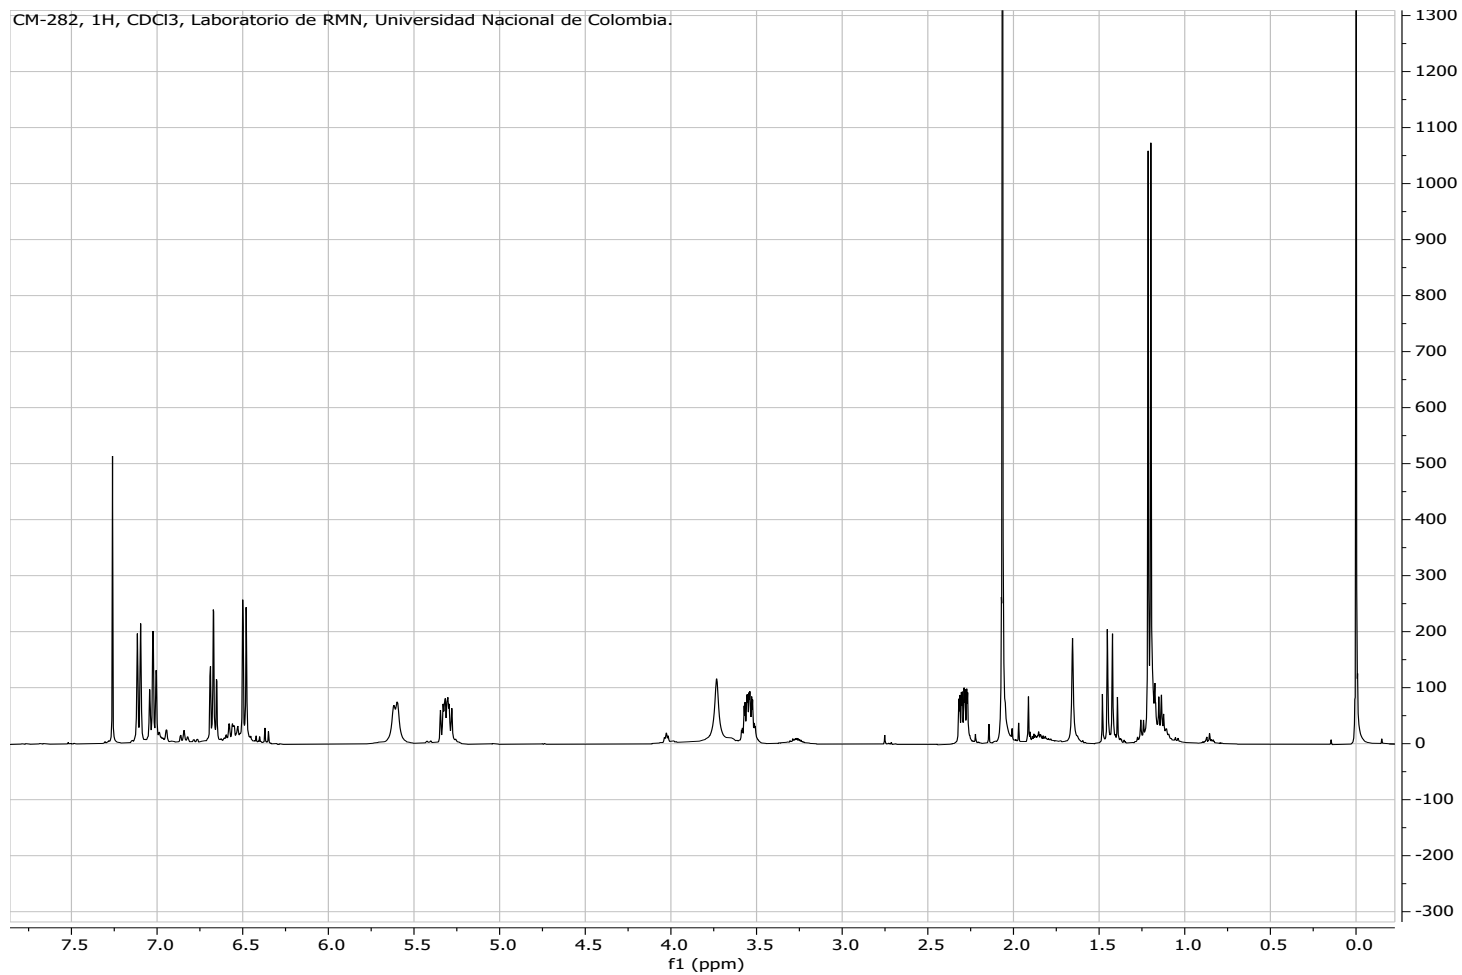

# <sup>13</sup>C NMR spectra of N-(2-Methyl-1,2,3,4-tetrahydroquinolin-4-yl)acetamide (17)

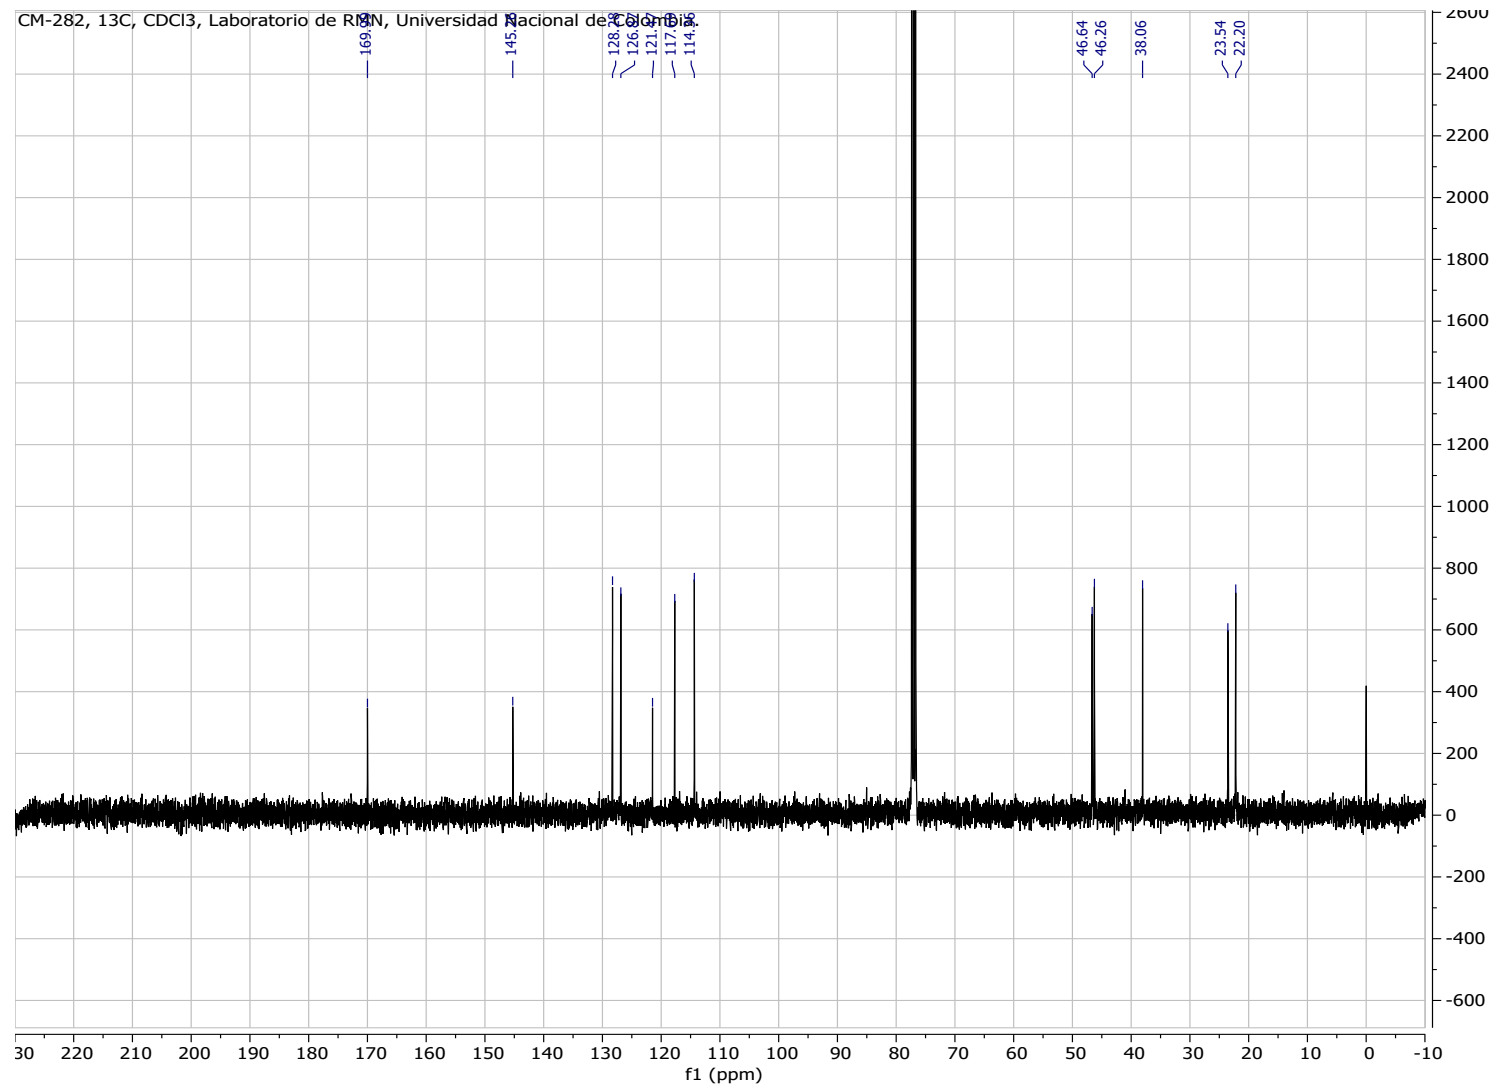

# <sup>1</sup>H NMR spectra of N-(6-Methoxy-2-methyl-1,2,3,4-tetrahydroquinolin-4-yl)acet- amide (19)

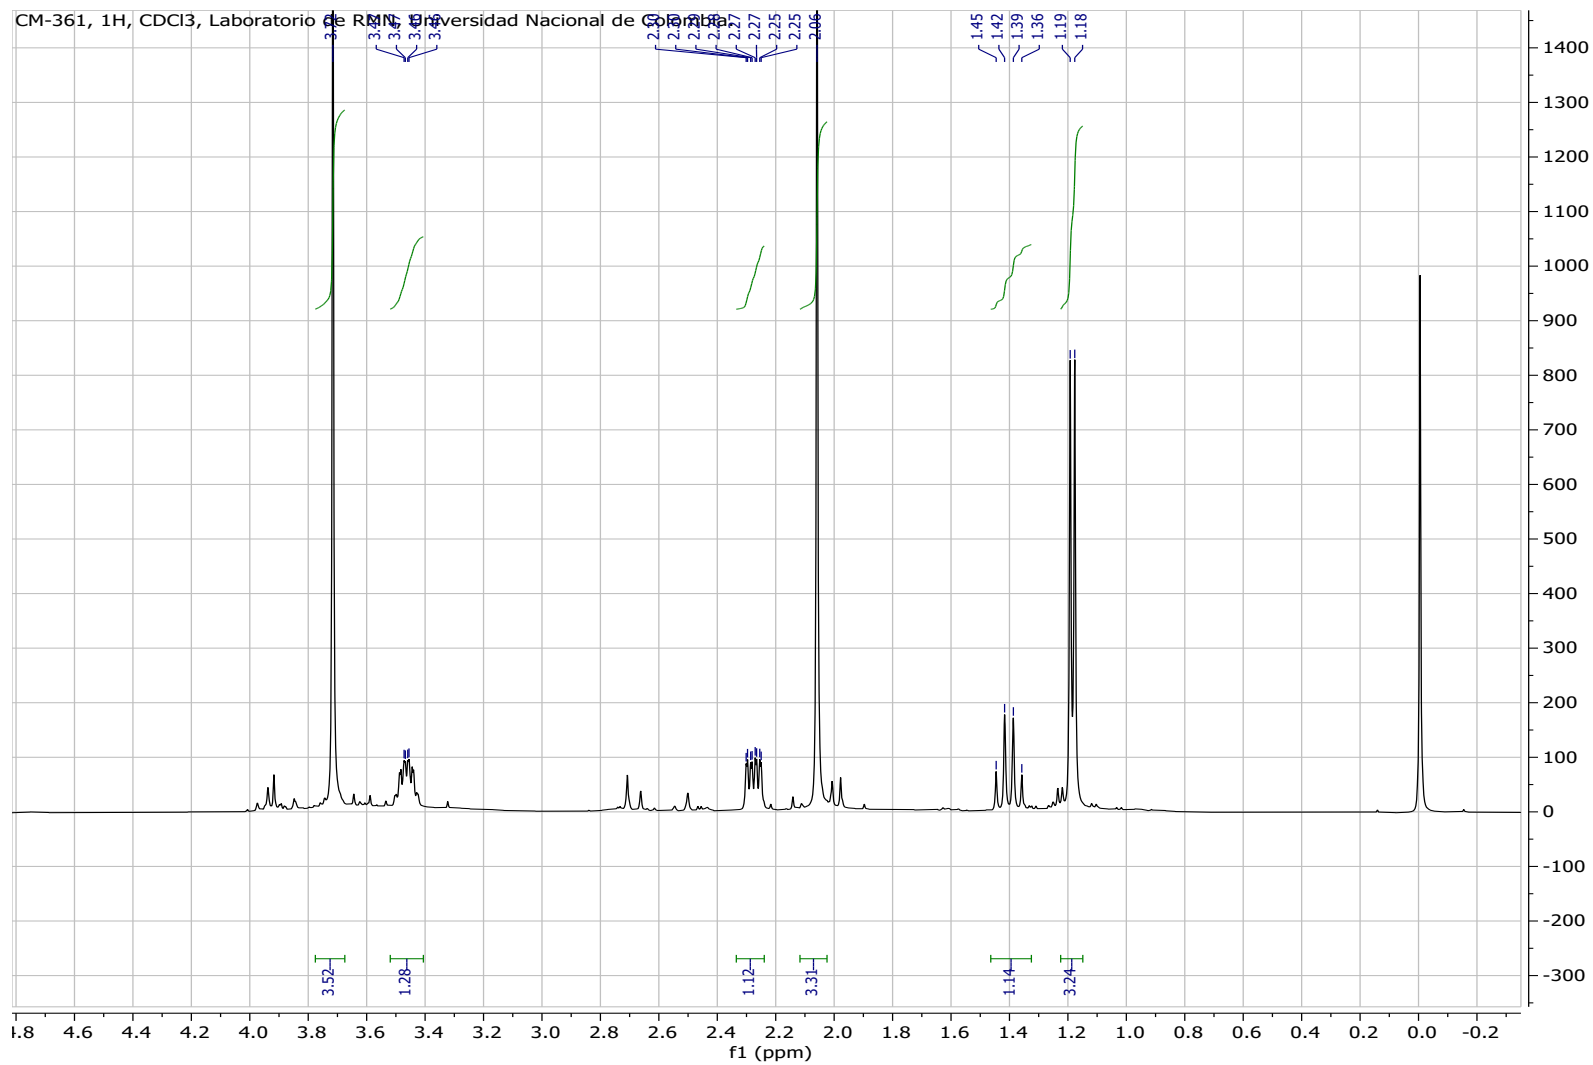



**<sup>13</sup>C NMR spectra of N-(6-Methoxy-2-methyl-1,2,3,4-tetrahydroquinolin-4-yl)acet- amide (19)**

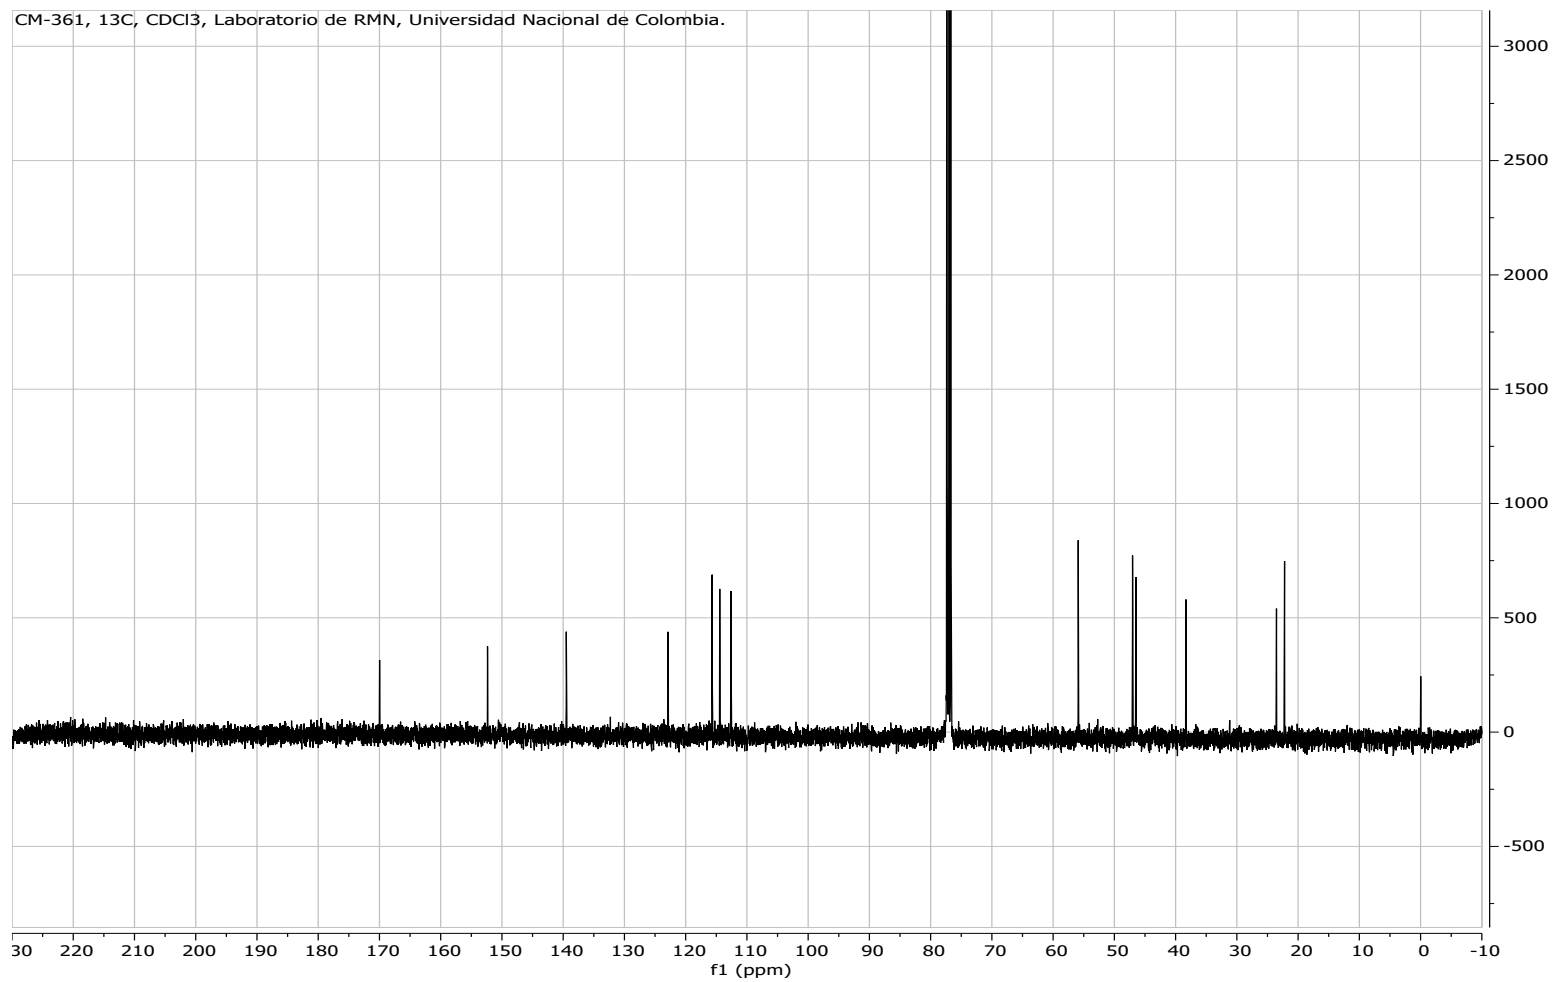

**<sup>1</sup>H NMR spectra of N-(2,5,7-Trimethyl-1,2,3,4-tetrahydroquinolin-4-yl)acetamide (20)**

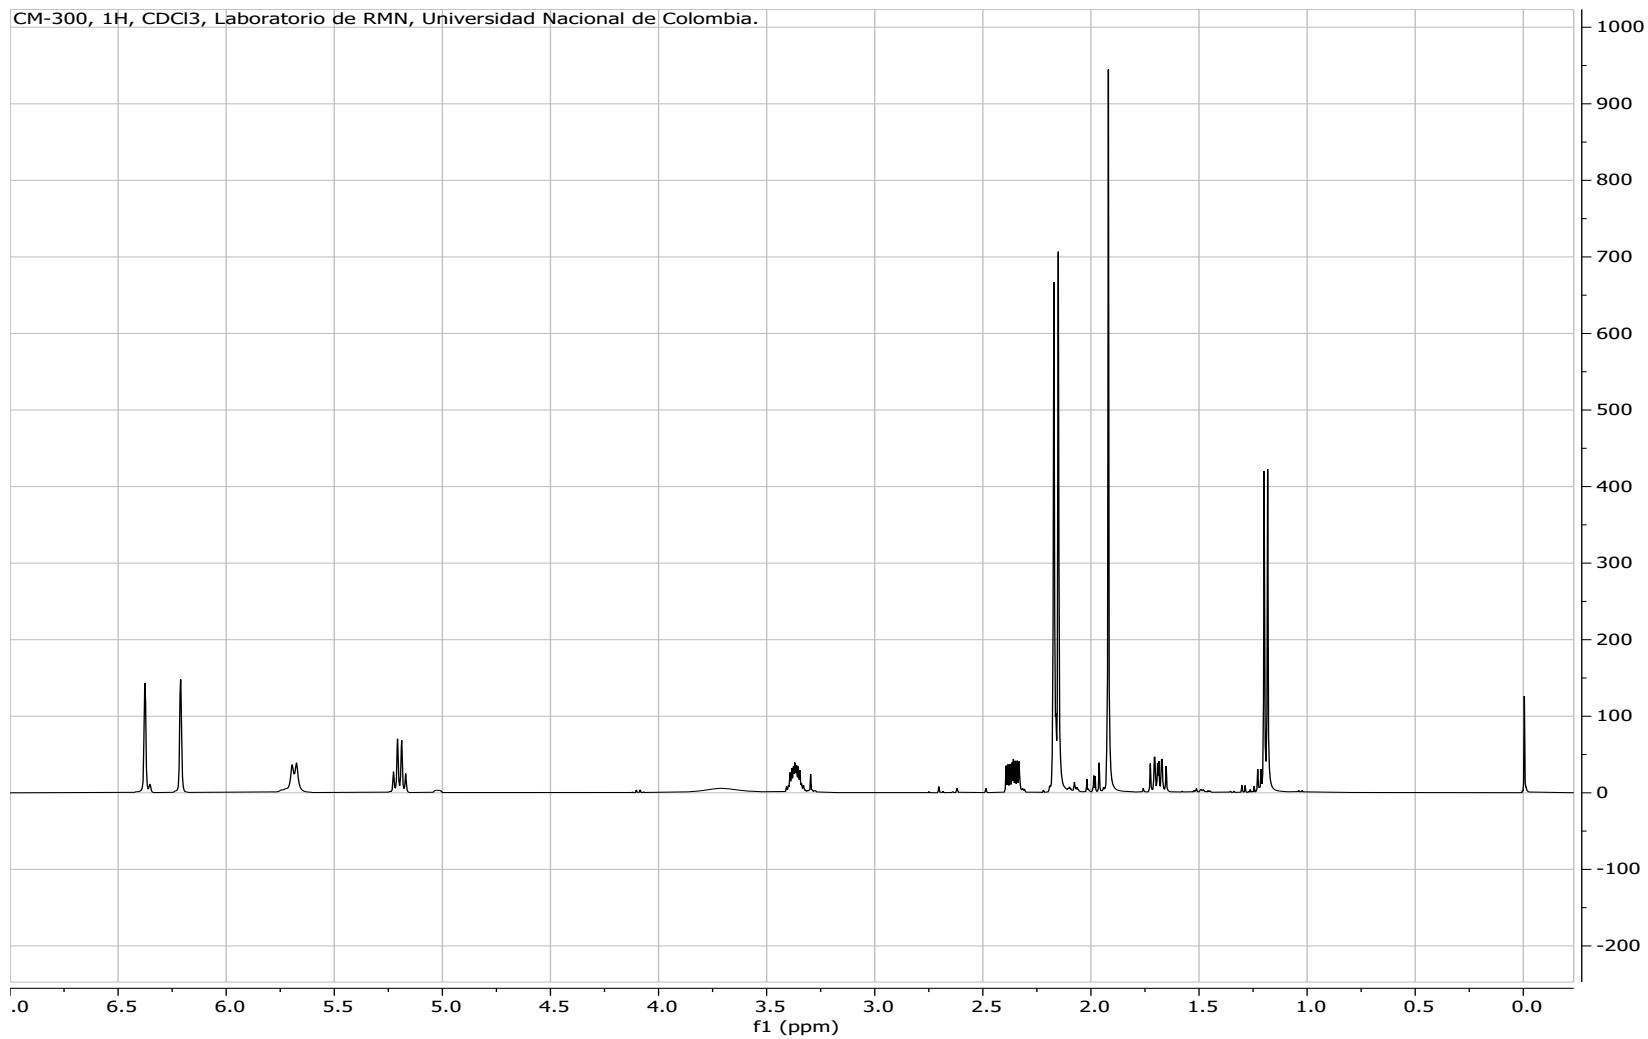

# <sup>13</sup>C NMR spectra of N-(2,5,7-Trimethyl-1,2,3,4-tetrahydroquinolin-4-yl)acetamide (20)

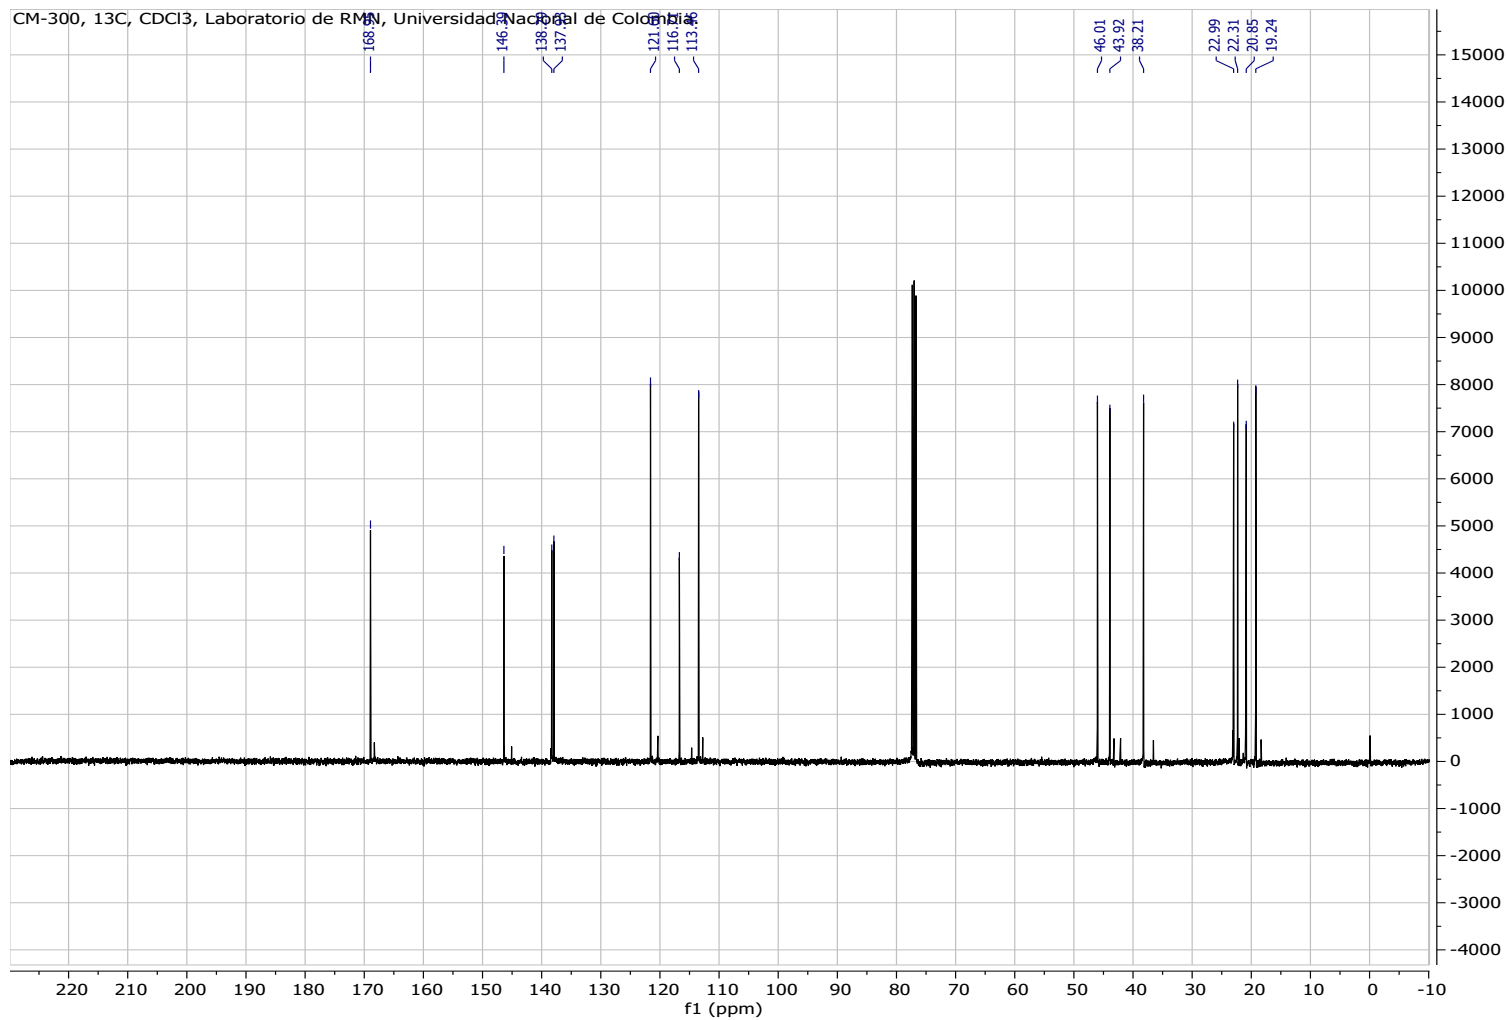

# <sup>1</sup>H NMR spectra of N-(6-Chloro-2-methyl-1,2,3,4-tetrahydroquinolin-4-yl)acet- amide (21)

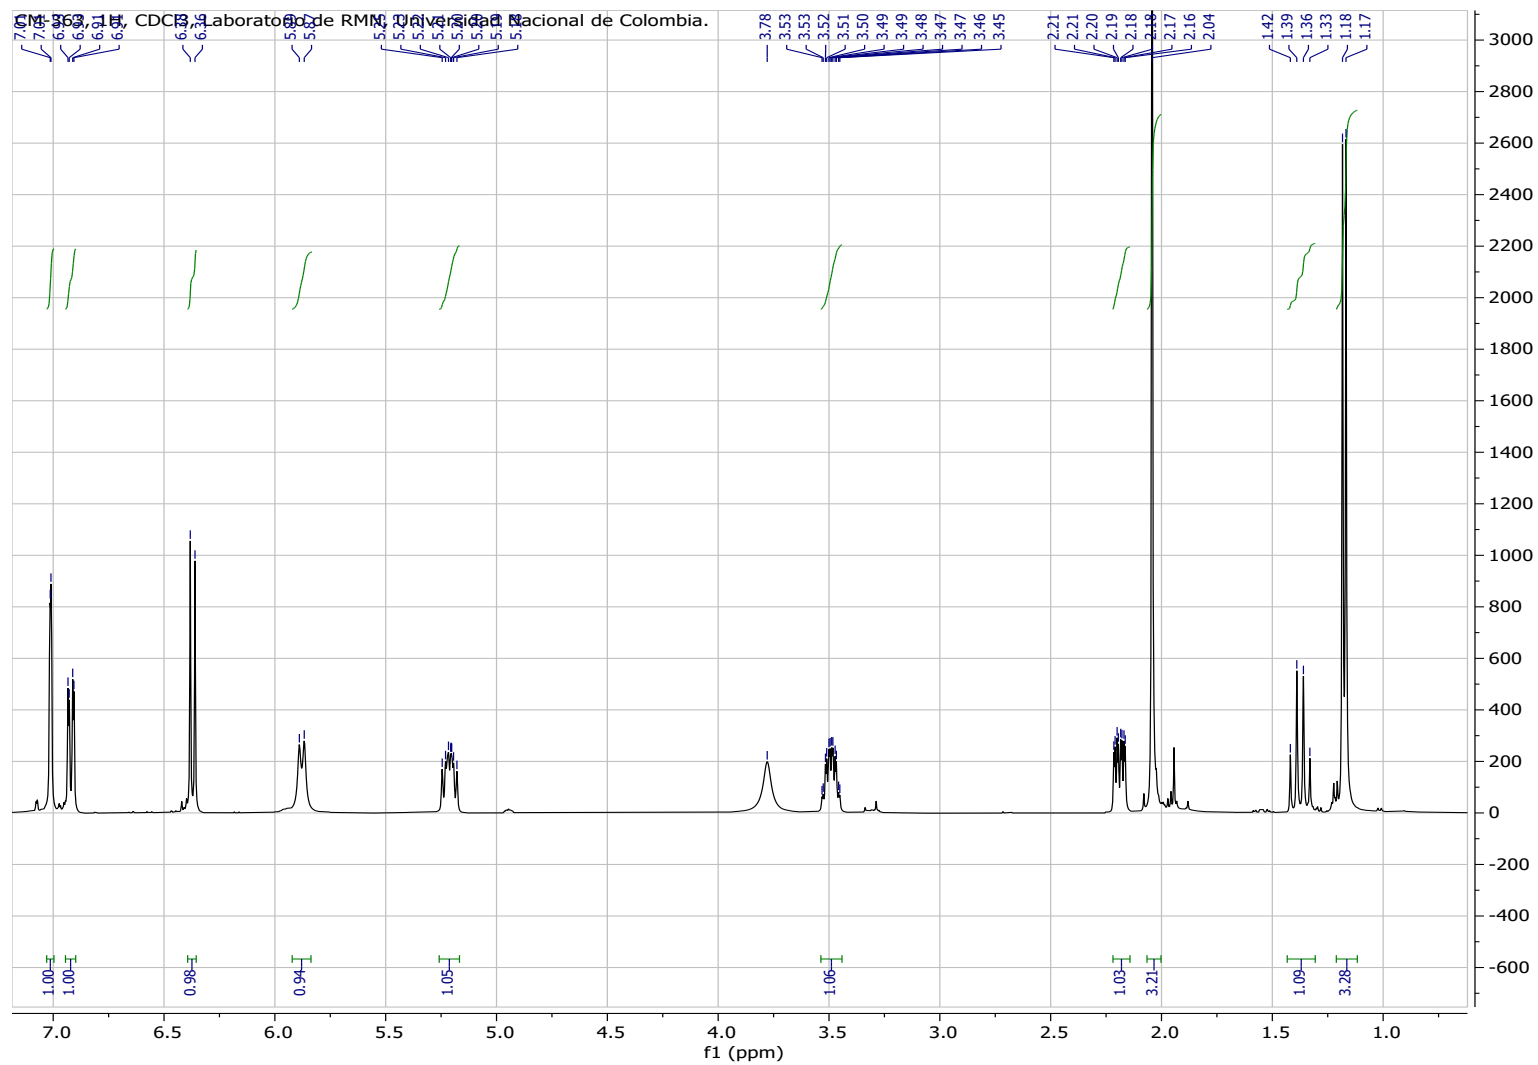

# <sup>13</sup>C NMR spectra of N-(6-Chloro-2-methyl-1,2,3,4-tetrahydroquinolin-4-yl)acet- amide (21)

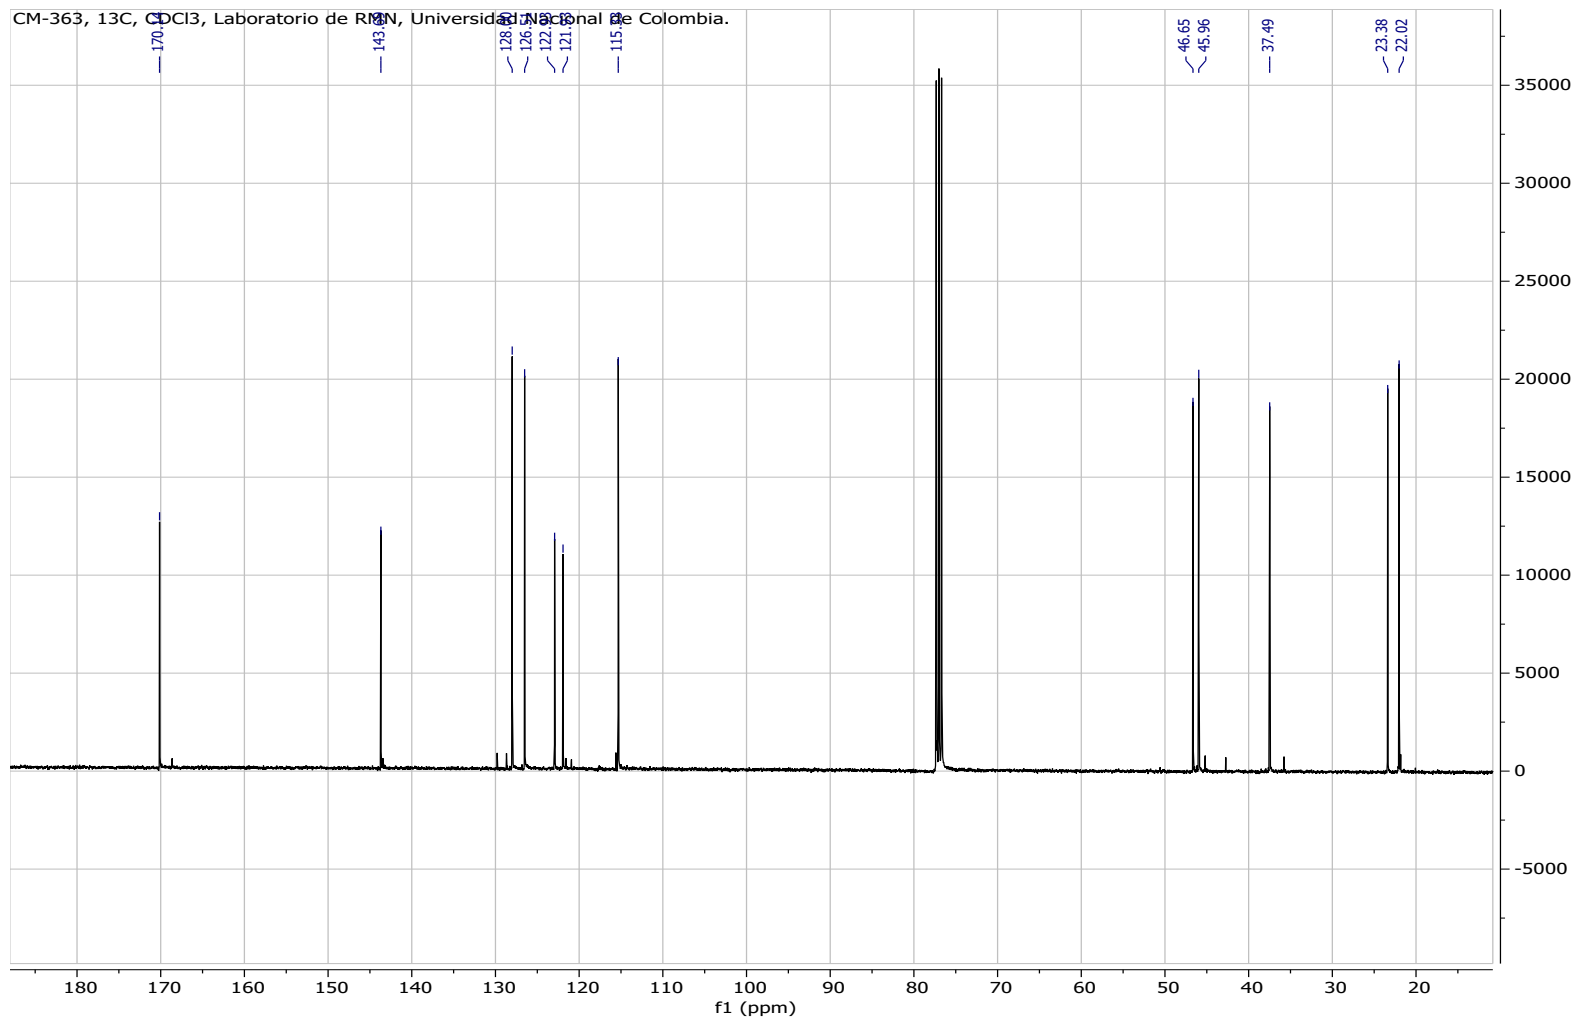

# <sup>1</sup>H NMR spectra of N-(6-Fluor-2-methyl-1,2,3,4-tetrahydroquinolin-4-yl)acet- amide (22)

CM-364, 1H, CDCl3, Laboratorio de RMN, Universidad Nacional de Colombia.

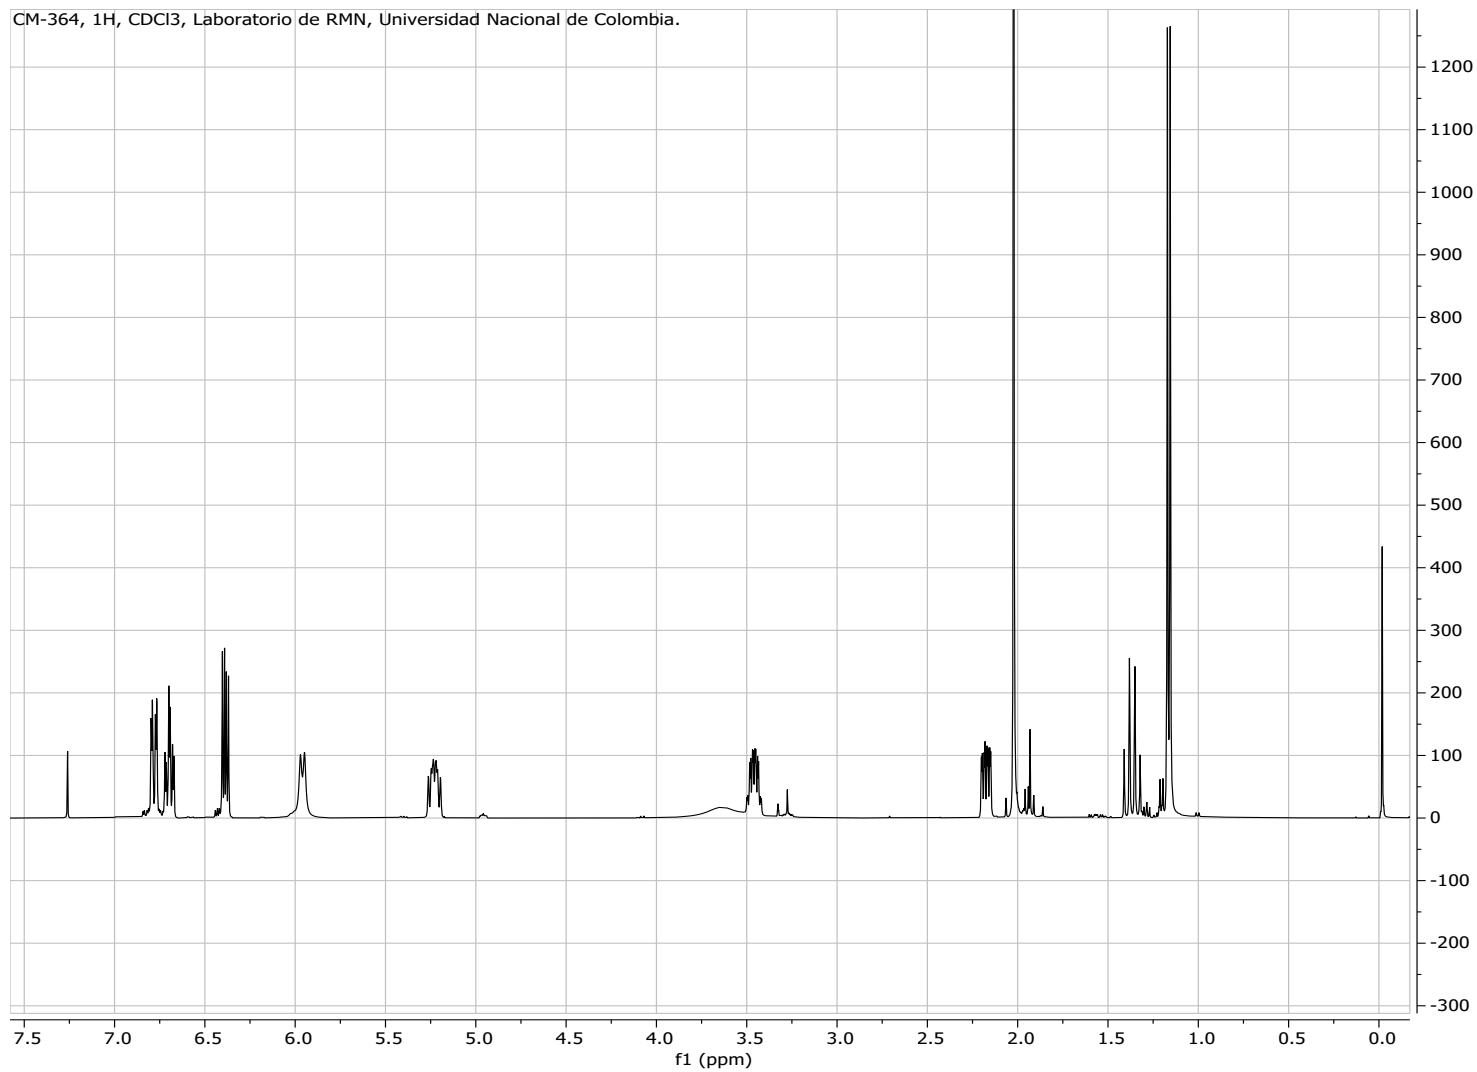

**<sup>13</sup>C NMR spectra of N-(6-Fluor-2-methyl-1,2,3,4-tetrahydroquinolin-4-yl)acet- amide (22)**

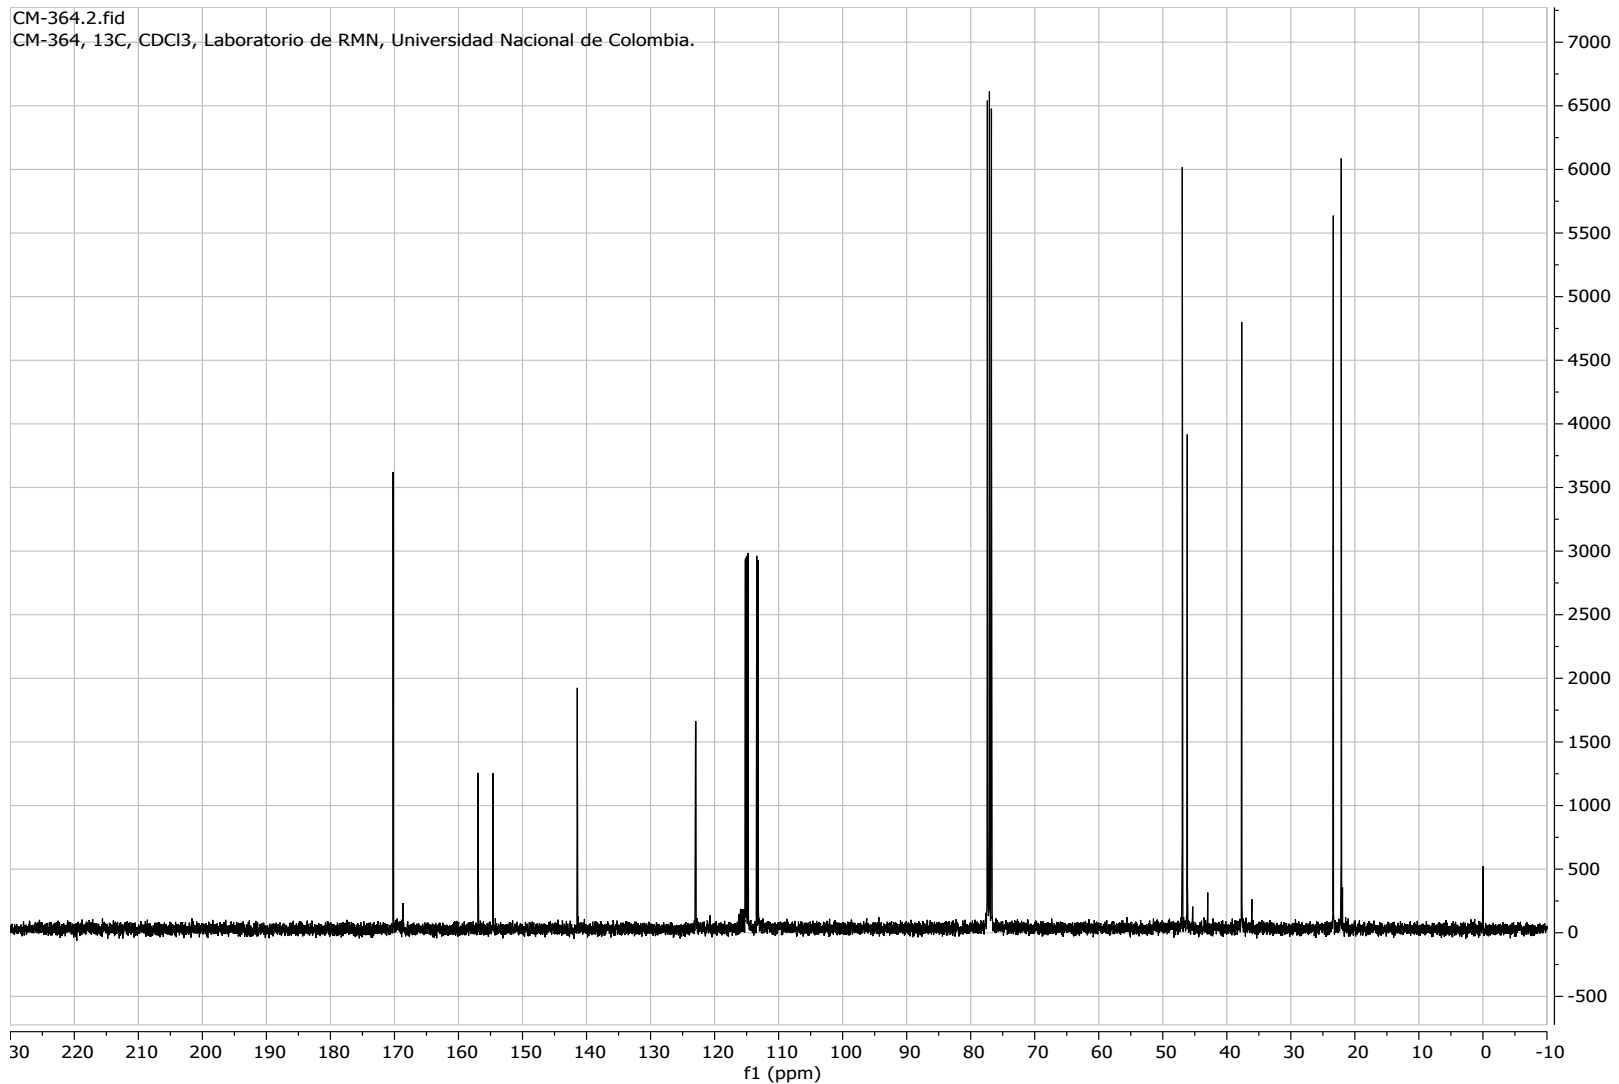

# DEPT 135 NMR spectra of N-(6-Fluor-2-methyl-1,2,3,4-tetrahydroquinolin-4-yl)acet- amide (22)

CM-364.3.fid

CM-364, DEPT135, CDCl<sub>3</sub>, Laboratorio de RMN, Universidad Nacional de Colombia.

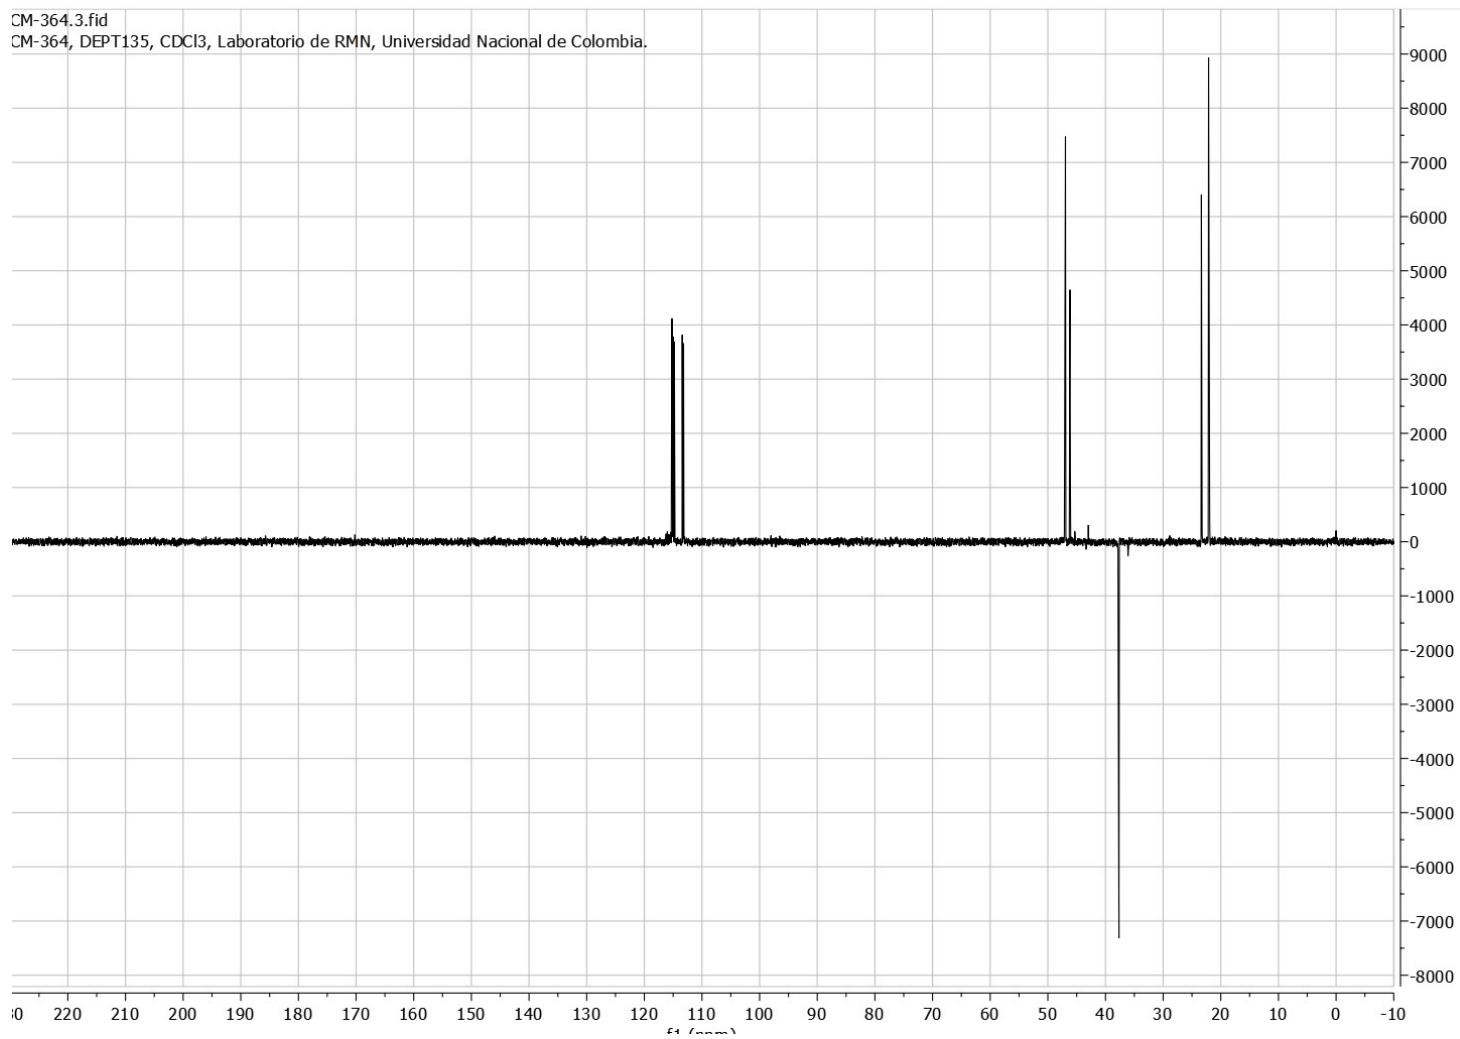



## 2.3 In silico studies

### 2.3.1 Molecular Docking studies

**Table S1**

The binding affinity of the 2-substituted (tetrahydro)quinolines **4–22** for the different biological targets.

| Comp.      | R                      | Binding affinity (kcal/mol) |       |       |       |
|------------|------------------------|-----------------------------|-------|-------|-------|
|            |                        | KDM5A                       | KDM4B | KDM4A | HER-2 |
| <b>4</b>   | H                      | -7.50                       | -6.51 | -7.50 | -8.09 |
| <b>5</b>   | 6-Et                   | -8.21                       | -6.89 | -8.21 | -8.13 |
| <b>6</b>   | 6-NO <sub>2</sub>      | -7.81                       | -7.73 | -7.81 | -7.67 |
| <b>7</b>   | 6-F                    | -7.45                       | -6.26 | -7.45 | -7.77 |
| <b>8</b>   | 6-Cl                   | -8.02                       | -6.75 | -8.02 | -7.88 |
| <b>9</b>   | 6-OMe                  | -7.78                       | -6.59 | -7.78 | -7.72 |
| <b>10</b>  | 5,6-OCH <sub>2</sub> O | -8.33                       | -7.03 | -8.33 | -8.03 |
| <b>11</b>  | H                      | -8.15                       | -7.19 | -8.15 | -8.02 |
| <b>12</b>  | 6-Me                   | -8.22                       | -7.50 | -8.22 | -8.24 |
| <b>13</b>  | 6-OMe                  | -7.93                       | -7.38 | -7.93 | -8.05 |
| <b>14</b>  | Et                     | -8.15                       | -7.81 | -7.93 | -8.63 |
| <b>15</b>  | 6,8-OMe                | -7.88                       | -7.40 | -7.88 | -8.22 |
| <b>16</b>  | 5,7-Me                 | -8.51                       | -7.76 | -8.51 | -8.78 |
| <b>17</b>  | H                      | -5.95                       | -6.35 | -5.95 | -6.90 |
| <b>18</b>  | Et                     | -6.43                       | -6.48 | -6.43 | -7.04 |
| <b>19</b>  | OMe                    | -6.03                       | -6.33 | -6.03 | -6.51 |
| <b>20</b>  | 5,7-Me                 | -6.76                       | -6.72 | -6.76 | -6.61 |
| <b>21</b>  | Cl                     | -6.32                       | -6.28 | -6.32 | -6.81 |
| <b>22</b>  | F                      | -5.87                       | -6.21 | -5.87 | -6.65 |
| <b>DOX</b> | -                      | -9.79                       | -5.17 | -9.79 | -7.72 |

### 3.4 Molecular dynamics studies

#### 3.4.1 Conformational analysis of the complexes formed by the proteins KDM5A and KDM4B.

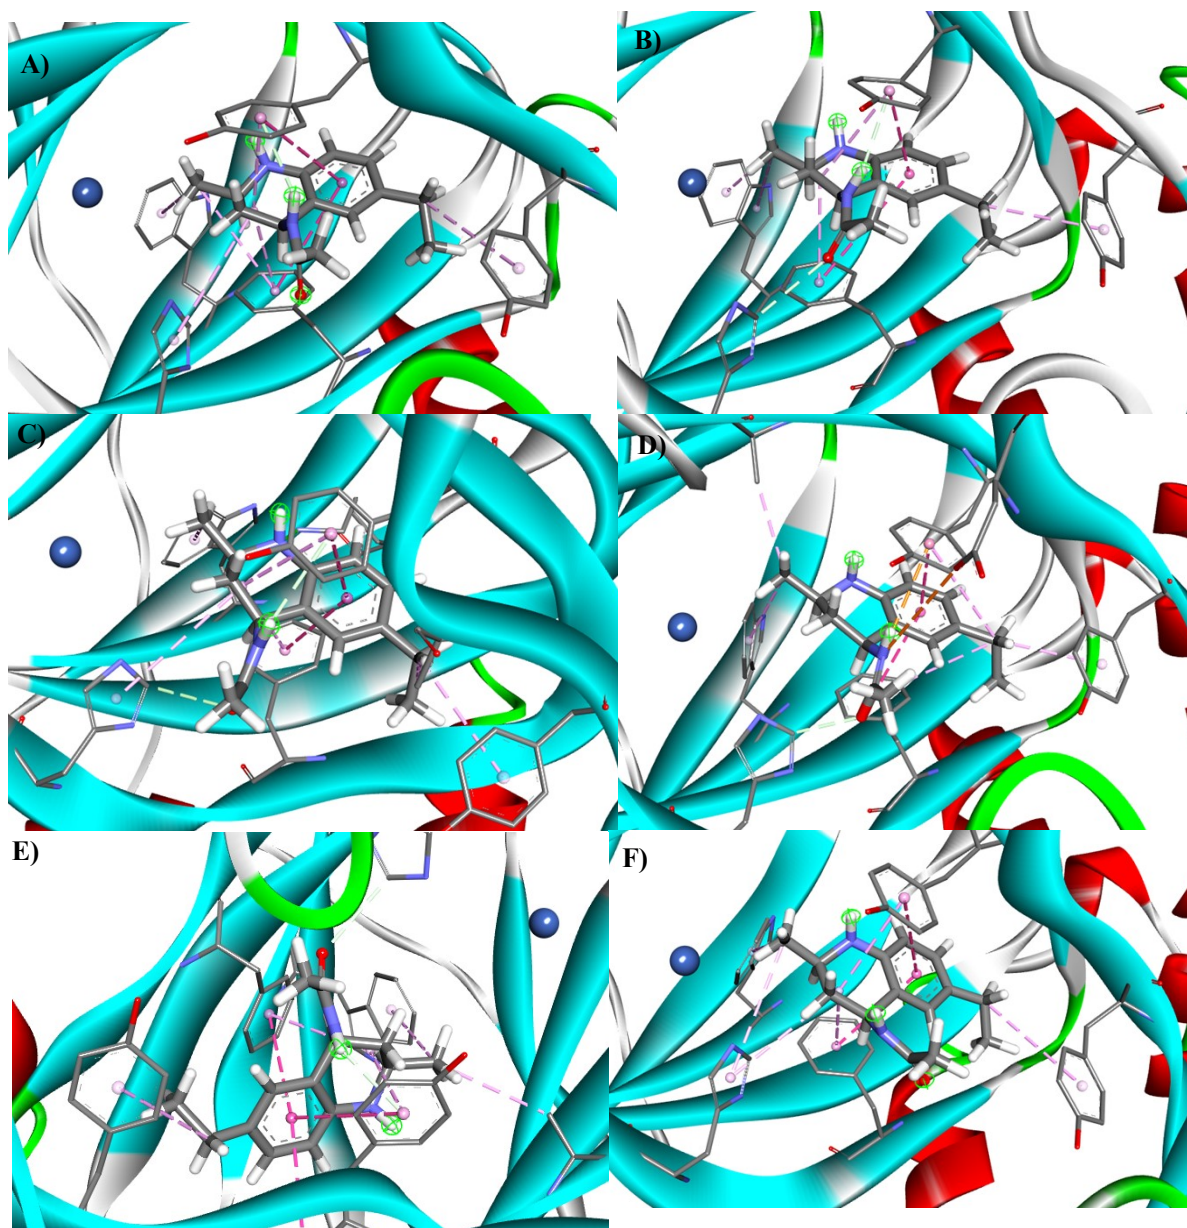

**Figure S2.** Representative snapshots from the MD simulation at (A) 5 ns, (B) 10 ns, (C) 15 ns, (D) 20 ns, (E) 25 ns, and (F) 30 ns of the molecular dynamics trajectory of 18 with KDM5A.

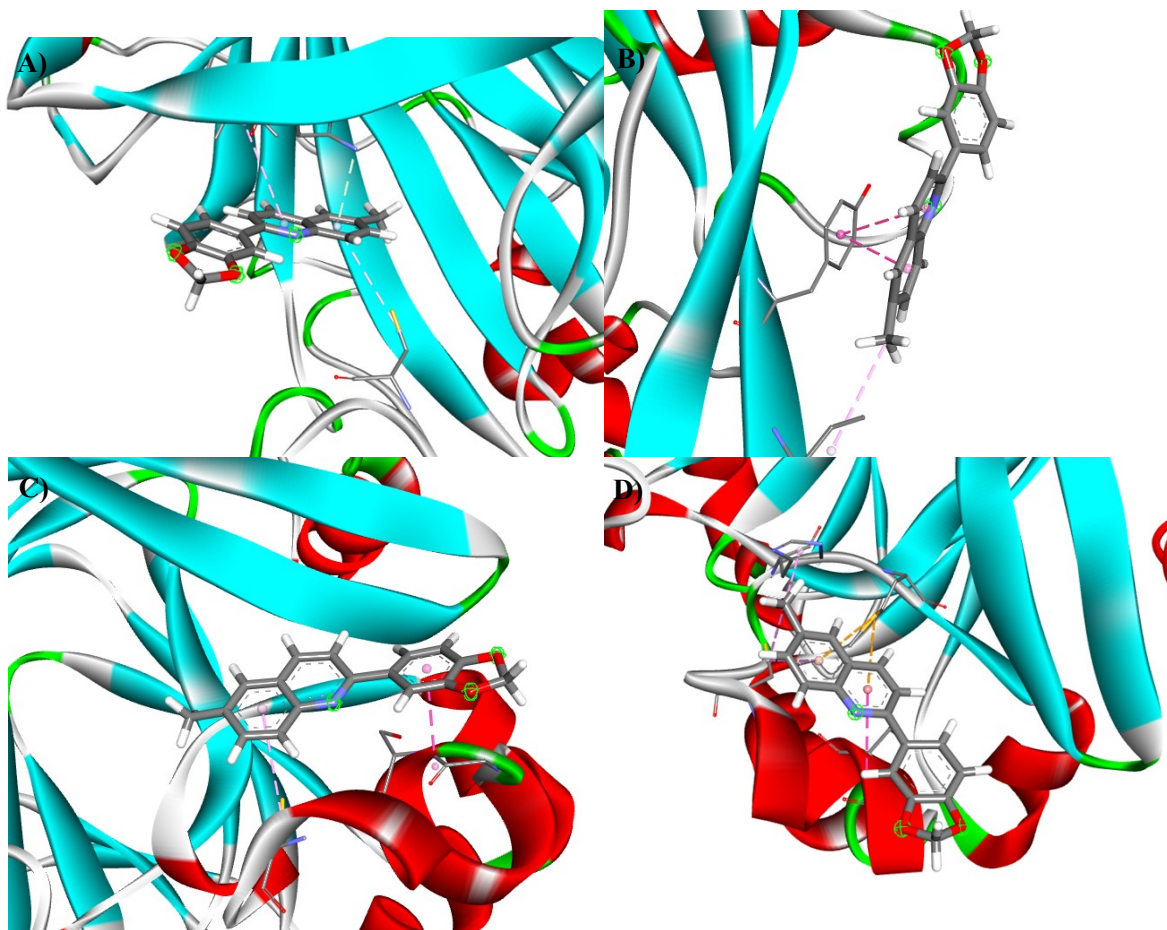

**Figure S3.** Representative snapshots from the MD simulation at (A) 5 ns, (B) 10 ns, (C) 15 ns, (D) 20 - 30 ns, of the molecular dynamics trajectory of 12 with KDM4B.

### 2.3.3 In-silico ADME properties

**Table S2.** ADME prediction results of the synthesized 2-substituted (tetrahydro)quinolines **4–22**.

| Comp.           | Group    | MW <sup>a</sup> | cLogP <sup>b</sup> | TPSA <sup>c</sup> | HBA <sup>d</sup> | HBD <sup>e</sup> | ROTB <sup>f</sup> | % ABS. <sup>g</sup> | LogS <sup>h</sup> |
|-----------------|----------|-----------------|--------------------|-------------------|------------------|------------------|-------------------|---------------------|-------------------|
| <b>4</b>        | <b>F</b> | 205.25          | 3.47               | 12.89             | 1                | 0                | 1                 | 104.55              | -6.22             |
| <b>5</b>        | <b>F</b> | 233.31          | 4.13               | 12.89             | 1                | 0                | 2                 | 104.55              | -7.02             |
| <b>6</b>        | <b>F</b> | 250.25          | 3.07               | 45.82             | 2                | 0                | 2                 | 93.19               | -5.97             |
| <b>7</b>        | <b>F</b> | 223.25          | 3.86               | 12.89             | 2                | 0                | 1                 | 104.55              | -6.50             |
| <b>8</b>        | <b>F</b> | 239.70          | 4.08               | 12.89             | 1                | 0                | 1                 | 104.55              | -6.84             |
| <b>9</b>        | <b>F</b> | 279.30          | 3.51               | 22.12             | 2                | 0                | 2                 | 101.37              | -6.35             |
| <b>10</b>       | <b>F</b> | 249.26          | 3.34               | 31.35             | 3                | 0                | 1                 | 98.18               | -5.98             |
| <b>11</b>       | <b>G</b> | 249.26          | 3.35               | 31.35             | 3                | 0                | 1                 | 98.18               | -5.98             |
| <b>12</b>       | <b>G</b> | 263.29          | 3.67               | 31.35             | 3                | 0                | 1                 | 98.18               | -6.36             |
| <b>13</b>       | <b>G</b> | 279.29          | 3.34               | 40.58             | 4                | 0                | 2                 | 94.99               | -6.10             |
| <b>14</b>       | <b>G</b> | 277.32          | 3.98               | 31.35             | 3                | 0                | 3                 | 98.18               | -4.84             |
| <b>15</b>       | <b>G</b> | 309.32          | 3.3                | 49.81             | 5                | 0                | 3                 | 91.82               | -6.21             |
| <b>16</b>       | <b>G</b> | 277.32          | 4                  | 31.35             | 3                | 0                | 1                 | 98.18               | -6.74             |
| <b>17</b>       | <b>H</b> | 204.27          | 2.23               | 41.13             | 1                | 2                | 2                 | 94.81               | -3.60             |
| <b>18</b>       | <b>H</b> | 232.32          | 2.98               | 41.13             | 1                | 2                | 3                 | 94.81               | -4.39             |
| <b>19</b>       | <b>H</b> | 234.29          | 1.56               | 50.36             | 2                | 2                | 3                 | 91.63               | -3.73             |
| <b>20</b>       | <b>H</b> | 232.32          | 3.02               | 41.13             | 1                | 2                | 2                 | 94.81               | -4.38             |
| <b>21</b>       | <b>H</b> | 238.71          | 2.9                | 41.13             | 1                | 2                | 2                 | 94.81               | -4.22             |
| <b>22</b>       | <b>H</b> | 222.26          | 1.91               | 41.13             | 2                | 2                | 2                 | 94.81               | -3.88             |
| <b>DOX</b>      | -        | 543.50          | 0.48               | 206.08            | 12               | 7                | 5                 | 37.90               | -2.67             |
| Lipinski's Rule |          | < 500           | <5                 | < 140             | <10              | <5               | < 10              |                     |                   |

<sup>a</sup> Molecular weight (g/mol); <sup>b</sup> Logarithm of the partition coefficient between n-octanol and water; <sup>c</sup> Polar Surface Area (Å<sup>2</sup>), <sup>d</sup> Number of hydrogen-bond acceptors; <sup>e</sup> Number of hydrogen-bond donors; <sup>f</sup> Number of rotatable bonds; <sup>g</sup> Percentage of absorption calculated by % Absorption = 109-(0.345 x TPSA); <sup>h</sup> Logarithm of aqueous solubility.
